# Supplementary material for: Common elective orthopaedic procedures and their clinical effectiveness: umbrella review of level 1 evidence
Source: PubMed Central journal article supplement (PMC8262448; doi:10.1136/bmj.n1511), 2021-07-08
Supplement: bloa063464.ww1.pdf [file bloa063464.ww1.pdf]

## Supplementary Material

### Index

|                    |                                                                                            |
|--------------------|--------------------------------------------------------------------------------------------|
| <b>Appendix 1</b>  | PRISMA checklist                                                                           |
| <b>Appendix 2</b>  | MOOSE checklist                                                                            |
| <b>Appendix 3</b>  | Search strategy for each procedure                                                         |
| <b>Appendix 4</b>  | Hierarchy of evidence                                                                      |
| <b>Appendix 5</b>  | Reference list of included studies                                                         |
| <b>Appendix 6</b>  | Characteristics of included meta-analyses or relevant studies                              |
| <b>Appendix 7</b>  | AMSTAR scores for the included studies                                                     |
| <b>Appendix 8</b>  | Findings of randomised controlled trials at low risk of bias                               |
| <b>Appendix 9</b>  | Reference list of randomised controlled trials at low risk of bias                         |
| <b>Appendix 10</b> | Major guideline recommendations on subacromial decompression surgery                       |
| <b>Appendix 11</b> | Common orthopaedic procedures, body of evidence and recommendations by clinical guidelines |

## Appendix 1. PRISMA checklist

| Section/topic                      | Item No | Checklist item                                                                                                                                                                                                                                                                                         | Reported on page number/section name |
|------------------------------------|---------|--------------------------------------------------------------------------------------------------------------------------------------------------------------------------------------------------------------------------------------------------------------------------------------------------------|--------------------------------------|
| <b>Title</b>                       |         |                                                                                                                                                                                                                                                                                                        |                                      |
| Title                              | 1       | Identify the report as a systematic review, meta-analysis, or both                                                                                                                                                                                                                                     | 1                                    |
| <b>Abstract</b>                    |         |                                                                                                                                                                                                                                                                                                        |                                      |
| Structured summary                 | 2       | Provide a structured summary including, as applicable, background, objectives, data sources, study eligibility criteria, participants, interventions, study appraisal and synthesis methods, results, limitations, conclusions and implications of key findings, systematic review registration number | 2                                    |
| <b>Introduction</b>                |         |                                                                                                                                                                                                                                                                                                        |                                      |
| Rationale                          | 3       | Describe the rationale for the review in the context of what is already known                                                                                                                                                                                                                          | Introduction                         |
| Objectives                         | 4       | Provide an explicit statement of questions being addressed with reference to participants, interventions, comparisons, outcomes, and study design (PICOS)                                                                                                                                              | Introduction                         |
| <b>Methods</b>                     |         |                                                                                                                                                                                                                                                                                                        |                                      |
| Protocol and registration          | 5       | Indicate if a review protocol exists, if and where it can be accessed (such as web address), and, if available, provide registration information including registration number                                                                                                                         | Methods                              |
| Eligibility criteria               | 6       | Specify study characteristics (such as PICOS, length of follow-up) and report characteristics (such as years considered, language, publication status) used as criteria for eligibility, giving rationale                                                                                              | Methods                              |
| Information sources                | 7       | Describe all information sources (such as databases with dates of coverage, contact with study authors to identify additional studies) in the search and date last searched                                                                                                                            | Methods                              |
| Search                             | 8       | Present full electronic search strategy for at least one database, including any limits used, such that it could be repeated                                                                                                                                                                           | Appendix 3                           |
| Study selection                    | 9       | State the process for selecting studies (that is, screening, eligibility, included in systematic review, and, if applicable, included in the meta-analysis)                                                                                                                                            | Methods                              |
| Data collection process            | 10      | Describe method of data extraction from reports (such as piloted forms, independently, in duplicate) and any processes for obtaining and confirming data from investigators                                                                                                                            | Methods                              |
| Data items                         | 11      | List and define all variables for which data were sought (such as PICOS, funding sources) and any assumptions and simplifications made                                                                                                                                                                 | Methods                              |
| Risk of bias in individual studies | 12      | Describe methods used for assessing risk of bias of individual studies (including specification of whether this was done at the study or outcome level), and how this information is to be used in any data synthesis                                                                                  | Methods                              |
| Summary measures                   | 13      | State the principal summary measures (such as risk ratio, difference in means).                                                                                                                                                                                                                        | Methods                              |
| Synthesis of results               | 14      | Describe the methods of handling data and combining results of studies, if done, including measures of consistency (such as $I^2$ statistic) for each meta-analysis                                                                                                                                    | Methods                              |
| Risk of bias across studies        | 15      | Specify any assessment of risk of bias that may affect the cumulative evidence (such as publication bias, selective reporting within studies)                                                                                                                                                          | Methods                              |
| Additional analyses                | 16      | Describe methods of additional analyses (such as sensitivity or subgroup analyses, meta-regression), if done, indicating which were pre-specified                                                                                                                                                      | Methods                              |
| <b>Results</b>                     |         |                                                                                                                                                                                                                                                                                                        |                                      |
| Study selection                    | 17      | Give numbers of studies screened, assessed for eligibility, and included in the review, with reasons for exclusions at each stage, ideally with a flow diagram                                                                                                                                         | Results; Appendix 6                  |
| Study characteristics              | 18      | For each study, present characteristics for which data were extracted (such as study size, PICOS, follow-up period) and provide the citations                                                                                                                                                          | Results; Table 2                     |
| Risk of bias within studies        | 19      | Present data on risk of bias of each study and, if available, any outcome-level assessment (see item 12).                                                                                                                                                                                              | Results; Table 3                     |
| Results of individual studies      | 20      | For all outcomes considered (benefits or harms), present for each study (a) simple summary data for each intervention group and (b) effect estimates and confidence intervals, ideally with a forest plot                                                                                              | Results; Table 2                     |
| Synthesis of results               | 21      | Present results of each meta-analysis done, including confidence intervals and measures of consistency                                                                                                                                                                                                 | Results; Table 2                     |
| Risk of bias across studies        | 22      | Present results of any assessment of risk of bias across studies (see item 15)                                                                                                                                                                                                                         | Results; Table 3                     |
| Additional analysis                | 23      | Give results of additional analyses, if done (such as sensitivity or subgroup analyses, meta-regression) (see item 16)                                                                                                                                                                                 | Not applicable                       |
| <b>Discussion</b>                  |         |                                                                                                                                                                                                                                                                                                        |                                      |
| Summary of evidence                | 24      | Summarise the main findings including the strength of evidence for each main outcome; consider their relevance to key groups (such as health care providers, users, and policy makers)                                                                                                                 | Discussion                           |
| Limitations                        | 25      | Discuss limitations at study and outcome level (such as risk of bias), and at review level (such as incomplete retrieval of identified research, reporting bias)                                                                                                                                       | Discussion                           |
| Conclusions                        | 26      | Provide a general interpretation of the results in the context of other evidence, and implications for future research                                                                                                                                                                                 | Discussion                           |
| <b>Funding</b>                     |         |                                                                                                                                                                                                                                                                                                        |                                      |
| Funding                            | 27      | Describe sources of funding for the systematic review and other support (such as supply of data) and role of funders for the systematic review                                                                                                                                                         | Discussion                           |

## Appendix 2. MOOSE checklist

| Criteria                                           |                                                                                                                                            | Brief description of how the criteria were handled in the review                                                                                                                                                                                                                                                                                                                                                                                                                           |
|----------------------------------------------------|--------------------------------------------------------------------------------------------------------------------------------------------|--------------------------------------------------------------------------------------------------------------------------------------------------------------------------------------------------------------------------------------------------------------------------------------------------------------------------------------------------------------------------------------------------------------------------------------------------------------------------------------------|
| <b>Reporting of background</b>                     |                                                                                                                                            |                                                                                                                                                                                                                                                                                                                                                                                                                                                                                            |
| √                                                  | Problem definition                                                                                                                         | Recommendations in clinical guidelines for common orthopaedic interventions often lack strong supporting evidence, particularly in the form of clinical trials. It is concerning that orthopaedic interventions and prostheses do not have readily available evidence to support their use. In this context, we have carried out an umbrella review (systematic review and meta-analysis) to evaluate the body of evidence behind ten of the commonest orthopaedic surgical interventions. |
| √                                                  | Hypothesis statement                                                                                                                       | There is not a strong evidence base to support many commonly performed orthopaedic procedures.                                                                                                                                                                                                                                                                                                                                                                                             |
| √                                                  | Description of study outcomes                                                                                                              | The quality and quantity of the evidence behind the commonest orthopaedic interventions, and the strength of the recommendations in relevant national clinical guidelines                                                                                                                                                                                                                                                                                                                  |
| √                                                  | Type of exposure                                                                                                                           | Arthroscopic anterior cruciate ligament reconstruction, arthroscopic meniscal repair of the knee, arthroscopic partial meniscectomy of the knee, arthroscopic rotator cuff repair, arthroscopic subacromial decompression, carpal tunnel decompression, lumbar spine decompression, lumbar spine fusion, total hip replacement, and total knee replacement                                                                                                                                 |
| √                                                  | Type of study designs used                                                                                                                 | Comparative observational studies and randomised controlled trials                                                                                                                                                                                                                                                                                                                                                                                                                         |
| √                                                  | Study population                                                                                                                           | Patients undergoing the aforementioned exposures, compared to patients undergoing no treatment/placebo/nonoperative treatment                                                                                                                                                                                                                                                                                                                                                              |
| <b>Reporting of search strategy should include</b> |                                                                                                                                            |                                                                                                                                                                                                                                                                                                                                                                                                                                                                                            |
| √                                                  | Qualifications of searchers                                                                                                                | Setor K Kunutsor, PhD; Richard L Donovan, MSc                                                                                                                                                                                                                                                                                                                                                                                                                                              |
| √                                                  | Search strategy, including time period included in the synthesis and keywords                                                              | Time period: from inception to September 2020<br>The detailed search strategy can be found in Appendix 3                                                                                                                                                                                                                                                                                                                                                                                   |
| √                                                  | Databases and registries searched                                                                                                          | MEDLINE, EMBASE, Web of Science, and Cochrane databases                                                                                                                                                                                                                                                                                                                                                                                                                                    |
| √                                                  | Search software used, name and version, including special features                                                                         | OvidSP was used to search EMBASE and MEDLINE<br>EndNote X9 used to manage references                                                                                                                                                                                                                                                                                                                                                                                                       |
| √                                                  | Use of hand searching                                                                                                                      | We searched bibliographies of retrieved papers                                                                                                                                                                                                                                                                                                                                                                                                                                             |
| √                                                  | List of citations located and those excluded, including justifications                                                                     | Details of the literature search process are outlined in Appendix 6. The citation list for excluded studies is available on request.                                                                                                                                                                                                                                                                                                                                                       |
| √                                                  | Method of addressing articles published in languages other than English                                                                    | Not applicable                                                                                                                                                                                                                                                                                                                                                                                                                                                                             |
| √                                                  | Method of handling abstracts and unpublished studies                                                                                       | Abstracts with no full-text publications were not included.                                                                                                                                                                                                                                                                                                                                                                                                                                |
| √                                                  | Description of any contact with authors                                                                                                    | None                                                                                                                                                                                                                                                                                                                                                                                                                                                                                       |
| <b>Reporting of methods should include</b>         |                                                                                                                                            |                                                                                                                                                                                                                                                                                                                                                                                                                                                                                            |
| √                                                  | Description of relevance or appropriateness of studies assembled for assessing the hypothesis to be tested                                 | Detailed inclusion and exclusion criteria are described in the Methods section.                                                                                                                                                                                                                                                                                                                                                                                                            |
| √                                                  | Rationale for the selection and coding of data                                                                                             | Data extracted from each of the studies were relevant to the population characteristics, study design, exposure, and outcome.                                                                                                                                                                                                                                                                                                                                                              |
| √                                                  | Assessment of confounding                                                                                                                  | We assessed confounding by ranking individual studies based on different adjustment levels and performed subgroup analyses to evaluate differences in the overall estimates according to levels of adjustment.                                                                                                                                                                                                                                                                             |
| √                                                  | Assessment of study quality, including blinding of quality assessors; stratification or regression on possible predictors of study results | Study quality was assessed based on the eleven-item Assessment of Multiple Systematic Reviews (AMSTAR) instrument, which includes ratings for quality in the search, analysis, and transparency of a meta-analysis. It has good reliability and external validity.                                                                                                                                                                                                                         |
| √                                                  | Assessment of heterogeneity                                                                                                                | The heterogeneity of the studies was quantified with $I^2$ statistic that provides the relative amount of variance of the summary effect due to the between-study heterogeneity.                                                                                                                                                                                                                                                                                                           |
| √                                                  | Description of statistical methods in sufficient detail to be replicated                                                                   | Details are described in the Methods section.                                                                                                                                                                                                                                                                                                                                                                                                                                              |
| √                                                  | Provision of appropriate tables and graphics                                                                                               | Tables 1-3; Appendices 3-10                                                                                                                                                                                                                                                                                                                                                                                                                                                                |
| <b>Reporting of results should include</b>         |                                                                                                                                            |                                                                                                                                                                                                                                                                                                                                                                                                                                                                                            |
| √                                                  | Graph summarizing individual study estimates and overall estimate                                                                          | N/a                                                                                                                                                                                                                                                                                                                                                                                                                                                                                        |
| √                                                  | Table giving descriptive information for each study included                                                                               | Table 2                                                                                                                                                                                                                                                                                                                                                                                                                                                                                    |
| √                                                  | Results of sensitivity testing                                                                                                             | Table 3                                                                                                                                                                                                                                                                                                                                                                                                                                                                                    |
| √                                                  | Indication of statistical uncertainty of findings                                                                                          | N/a                                                                                                                                                                                                                                                                                                                                                                                                                                                                                        |

| <b>Reporting of discussion should include</b>  |                                                                |                                                                                                                                                                                                                                                                    |
|------------------------------------------------|----------------------------------------------------------------|--------------------------------------------------------------------------------------------------------------------------------------------------------------------------------------------------------------------------------------------------------------------|
| √                                              | Quantitative assessment of bias                                | Study quality was assessed based on the eleven-item Assessment of Multiple Systematic Reviews (AMSTAR) instrument, which includes ratings for quality in the search, analysis, and transparency of a meta-analysis. It has good reliability and external validity. |
| √                                              | Justification for exclusion                                    | All studies were excluded based on the pre-defined inclusion criteria in the Methods section.                                                                                                                                                                      |
| √                                              | Assessment of quality of included studies                      | This is discussed included in the Methods section.                                                                                                                                                                                                                 |
| <b>Reporting of conclusions should include</b> |                                                                |                                                                                                                                                                                                                                                                    |
| √                                              | Consideration of alternative explanations for observed results | This is described in the Discussion section.                                                                                                                                                                                                                       |
| √                                              | Generalization of the conclusions                              | This is discussed in the context of the results.                                                                                                                                                                                                                   |
| √                                              | Guidelines for future research                                 | We recommend definitive randomised controlled trials are required to vastly improve the quality of orthopaedic research.                                                                                                                                           |
| √                                              | Disclosure of funding source                                   | Provided.                                                                                                                                                                                                                                                          |

### Appendix 3. Search strategy for each procedure

|                                                                                                                                                                                                                                                                                                                                                                                                                                                                                                                                                                                                                                                                                                                                                                                                                                                                                                                                                                                                                                                                                                                                                                                                          |
|----------------------------------------------------------------------------------------------------------------------------------------------------------------------------------------------------------------------------------------------------------------------------------------------------------------------------------------------------------------------------------------------------------------------------------------------------------------------------------------------------------------------------------------------------------------------------------------------------------------------------------------------------------------------------------------------------------------------------------------------------------------------------------------------------------------------------------------------------------------------------------------------------------------------------------------------------------------------------------------------------------------------------------------------------------------------------------------------------------------------------------------------------------------------------------------------------------|
| <p><b>Arthroscopic anterior cruciate ligament reconstruction</b></p> <ol style="list-style-type: none"> <li>1 exp Arthroscopy/ or arthroscopic.mp. (31580)</li> <li>2 exp Anterior Cruciate Ligament Reconstruction/ (5032)</li> <li>3 ACL reconstruction.mp. (7040)</li> <li>4 ACLR.mp. (1197)</li> <li>5 (((comprehensive* or integrative or systematic*) adj3 (bibliographic* or review* or literature)) or (meta-analy* or metaanaly* or "research synthesis" or ((information or data) adj3 synthesis or (data adj2 extract*))).ti,ab. or (cinahl or (cochrane adj3 trial*) or embase or medline or psyclit or (psycinfo not "psycinfo database") or pubmed or scopus or "sociological abstracts" or "web of science").ab. or ("cochrane database of systematic reviews" or evidence report technology assessment or evidence report technology assessment summary).jn. or Evidence Report: Technology Assessment*.jn. or ((review adj5 (rationale or evidence)).ti,ab. and review.pt.) or meta-analysis as topic/ or Meta-Analysis.pt. (457870)</li> <li>6 2 or 3 or 4 (9115)</li> <li>7 1 and 5 and 6 (102)</li> <li>8 limit 7 to (english language and humans) (90)</li> </ol>                   |
| <p><b>Arthroscopic meniscal repair of the knee</b></p> <ol style="list-style-type: none"> <li>1 exp Arthroscopy/ or arthroscopic.mp. (31580)</li> <li>2 meniscus repair.mp. (461)</li> <li>3 meniscal repair.mp. (991)</li> <li>4 meniscal surgery.mp. (209)</li> <li>5 exp Knee/ or exp Knee Joint/ (71155)</li> <li>6 (((comprehensive* or integrative or systematic*) adj3 (bibliographic* or review* or literature)) or (meta-analy* or metaanaly* or "research synthesis" or ((information or data) adj3 synthesis or (data adj2 extract*))).ti,ab. or (cinahl or (cochrane adj3 trial*) or embase or medline or psyclit or (psycinfo not "psycinfo database") or pubmed or scopus or "sociological abstracts" or "web of science").ab. or ("cochrane database of systematic reviews" or evidence report technology assessment or evidence report technology assessment summary).jn. or Evidence Report: Technology Assessment*.jn. or ((review adj5 (rationale or evidence)).ti,ab. and review.pt.) or meta-analysis as topic/ or Meta-Analysis.pt. (457870)</li> <li>7 2 or 3 or 4 (1467)</li> <li>8 1 and 5 and 6 and 7 (25)</li> <li>9 limit 8 to (english language and humans) (25)</li> </ol> |
| <p><b>Arthroscopic partial meniscectomy of the knee</b></p> <ol style="list-style-type: none"> <li>1 exp Arthroscopy/ or arthroscopic.mp. (31580)</li> <li>2 exp Meniscectomy/ (240)</li> <li>3 menisc*.mp. (18214)</li> <li>4 exp Knee/ or exp Knee Joint/ (71155)</li> <li>5 (((comprehensive* or integrative or systematic*) adj3 (bibliographic* or review* or literature)) or (meta-analy* or metaanaly* or "research synthesis" or ((information or data) adj3 synthesis or (data adj2 extract*))).ti,ab. or (cinahl or (cochrane adj3 trial*) or embase or medline or psyclit or (psycinfo not "psycinfo database") or pubmed or scopus or "sociological abstracts" or "web of science").ab. or ("cochrane database of systematic reviews" or evidence report technology assessment or evidence report technology assessment summary).jn. or Evidence Report: Technology Assessment*.jn. or ((review adj5 (rationale or evidence)).ti,ab. and review.pt.) or meta-analysis as topic/ or Meta-Analysis.pt. (457870)</li> <li>6 2 or 3 (18214)</li> <li>7 1 and 4 and 5 and 6 (79)</li> <li>8 limit 7 to (english language and humans) (78)</li> </ol>                                              |
| <p><b>Arthroscopic rotator cuff repair</b></p> <ol style="list-style-type: none"> <li>1 exp Arthroscopy/ or arthroscop*.mp. (36005)</li> <li>2 exp Rotator Cuff/ (6447)</li> <li>3 (((comprehensive* or integrative or systematic*) adj3 (bibliographic* or review* or literature)) or (meta-analy* or metaanaly* or "research synthesis" or ((information or data) adj3 synthesis or (data adj2 extract*))).ti,ab. or (cinahl or (cochrane adj3 trial*) or embase or medline or psyclit or (psycinfo not "psycinfo database") or pubmed or scopus or "sociological abstracts" or "web of science").ab. or ("cochrane database of systematic reviews" or evidence report technology assessment or evidence report technology assessment summary).jn. or Evidence Report: Technology Assessment*.jn. or ((review adj5 (rationale or evidence)).ti,ab. and review.pt.) or meta-analysis as topic/ or Meta-Analysis.pt. (456965)</li> <li>4 1 and 2 and 3 (115)</li> <li>5 limit 4 to (english language and humans) (110)</li> </ol>                                                                                                                                                                        |

|                                                                                                                                                                                                                                                                                                                                                                                                                                                                                                                                                                                                                                                                                                                                                                                                                                                                                                                                                                                                                                                                                                                                                                                               |
|-----------------------------------------------------------------------------------------------------------------------------------------------------------------------------------------------------------------------------------------------------------------------------------------------------------------------------------------------------------------------------------------------------------------------------------------------------------------------------------------------------------------------------------------------------------------------------------------------------------------------------------------------------------------------------------------------------------------------------------------------------------------------------------------------------------------------------------------------------------------------------------------------------------------------------------------------------------------------------------------------------------------------------------------------------------------------------------------------------------------------------------------------------------------------------------------------|
| <p><b>Arthroscopic subacromial decompression</b></p> <p>1 Arthroscopy/ or arthroscop*.mp. (35699)<br/> 2 exp Decompression/ (2747)<br/> 3 subacromial.mp. (2758)<br/> 4 exp Shoulder/ (12902)<br/> 5 exp Shoulder Impingement Syndrome/ (1765)<br/> 6 subacromial impingement syndrome.mp. (408)<br/> 7 (((comprehensive* or integrative or systematic*) adj3 (bibliographic* or review* or literature)) or (meta-analy* or metaanaly* or "research synthesis" or ((information or data) adj3 synthesis or (data adj2 extract*))).ti,ab. or (cinahl or (cochrane adj3 trial*) or embase or medline or psyclit or (psycinfo not "psycinfo database") or pubmed or scopus or "sociological abstracts" or "web of science").ab. or ("cochrane database of systematic reviews" or evidence report technology assessment or evidence report technology assessment summary).jn. or Evidence Report: Technology Assessment*.jn. or ((review adj5 (rationale or evidence)).ti,ab. and review.pt.) or meta-analysis as topic/ or Meta-Analysis.pt. (451769)<br/> 8 1 or 2 or 3 or 4 (52178)<br/> 9 5 or 6 (1882)<br/> 10 7 and 8 and 9 (79)<br/> 11 limit 10 to (english language and humans) (71)</p> |
| <p><b>Carpal tunnel decompression</b></p> <p>1 carpal tunnel surgery.mp. (283)<br/> 2 carpal tunnel release.mp. (1675)<br/> 3 exp Decompression, Surgical/ (30551)<br/> 4 exp Carpal Tunnel Syndrome/ (8591)<br/> 5 (((comprehensive* or integrative or systematic*) adj3 (bibliographic* or review* or literature)) or (meta-analy* or metaanaly* or "research synthesis" or ((information or data) adj3 synthesis or (data adj2 extract*))).ti,ab. or (cinahl or (cochrane adj3 trial*) or embase or medline or psyclit or (psycinfo not "psycinfo database") or pubmed or scopus or "sociological abstracts" or "web of science").ab. or ("cochrane database of systematic reviews" or evidence report technology assessment or evidence report technology assessment summary).jn. or Evidence Report: Technology Assessment*.jn. or ((review adj5 (rationale or evidence)).ti,ab. and review.pt.) or meta-analysis as topic/ or Meta-Analysis.pt. (451321)<br/> 6 1 or 2 or 3 (32131)<br/> 7 4 and 5 and 6 (53)<br/> 8 limit 7 to (english language and humans) (49)</p>                                                                                                                  |
| <p><b>Lumbar spine decompression</b></p> <p>1 exp Decompression, Surgical/ or lumbar decompression.mp. (30909)<br/> 2 spinal decompression.mp. (640)<br/> 3 lumbar spinal decompression.mp. (42)<br/> 4 stenosis.mp. (194098)<br/> 5 (((comprehensive* or integrative or systematic*) adj3 (bibliographic* or review* or literature)) or (meta-analy* or metaanaly* or "research synthesis" or ((information or data) adj3 synthesis or (data adj2 extract*))).ti,ab. or (cinahl or (cochrane adj3 trial*) or embase or medline or psyclit or (psycinfo not "psycinfo database") or pubmed or scopus or "sociological abstracts" or "web of science").ab. or ("cochrane database of systematic reviews" or evidence report technology assessment or evidence report technology assessment summary).jn. or Evidence Report: Technology Assessment*.jn. or ((review adj5 (rationale or evidence)).ti,ab. and review.pt.) or meta-analysis as topic/ or Meta-Analysis.pt. (456914)<br/> 6 1 or 2 or 3 (31243)<br/> 7 4 and 5 and 6 (128)</p>                                                                                                                                                     |
| <p><b>Lumbar spine fusion</b></p> <p>1 exp Spinal Fusion/ (25464)<br/> 2 exp Lumbar Vertebrae/ or lumbar.mp. (122546)<br/> 3 exp Intervertebral Disc Degeneration/ or degenerative dis*.mp. (20491)<br/> 4 (((comprehensive* or integrative or systematic*) adj3 (bibliographic* or review* or literature)) or (meta-analy* or metaanaly* or "research synthesis" or ((information or data) adj3 synthesis or (data adj2 extract*))).ti,ab. or (cinahl or (cochrane adj3 trial*) or embase or medline or psyclit or (psycinfo not "psycinfo database") or pubmed or scopus or "sociological abstracts" or "web of science").ab. or ("cochrane database of systematic reviews" or evidence report technology assessment or evidence report technology assessment summary).jn. or Evidence Report: Technology Assessment*.jn. or ((review adj5 (rationale or evidence)).ti,ab. and review.pt.) or meta-analysis as topic/ or Meta-Analysis.pt. (457475)<br/> 5 1 and 2 and 3 and 4 (124)<br/> 6 limit 5 to (english language and humans) (118)</p>                                                                                                                                              |

**Total hip replacement**

- 1 exp Arthroplasty, Replacement, Hip/ (27189)
- 2 exp Osteoarthritis/ (63224)
- 3 (((comprehensive\* or integrative or systematic\*) adj3 (bibliographic\* or review\* or literature)) or (meta-analy\* or metaanaly\* or "research synthesis" or ((information or data) adj3 synthesis) or (data adj2 extract\*))).ti,ab. or (cinahl or (cochrane adj3 trial\*) or embase or medline or psyclit or (psycinfo not "psycinfo database") or pubmed or scopus or "sociological abstracts" or "web of science").ab. or ("cochrane database of systematic reviews" or evidence report technology assessment or evidence report technology assessment summary).jn. or Evidence Report: Technology Assessment\*.jn. or ((review adj5 (rationale or evidence)).ti,ab. and review.pt.) or meta-analysis as topic/ or Meta-Analysis.pt. (457475)
- 4 1 and 2 and 3 (145)
- 5 limit 4 to (english language and humans) (135)

**Total knee replacement**

- 1 exp Arthroplasty, Replacement, Knee/ (23882)
- 2 exp Osteoarthritis/ (63224)
- 3 (((comprehensive\* or integrative or systematic\*) adj3 (bibliographic\* or review\* or literature)) or (meta-analy\* or metaanaly\* or "research synthesis" or ((information or data) adj3 synthesis) or (data adj2 extract\*))).ti,ab. or (cinahl or (cochrane adj3 trial\*) or embase or medline or psyclit or (psycinfo not "psycinfo database") or pubmed or scopus or "sociological abstracts" or "web of science").ab. or ("cochrane database of systematic reviews" or evidence report technology assessment or evidence report technology assessment summary).jn. or Evidence Report: Technology Assessment\*.jn. or ((review adj5 (rationale or evidence)).ti,ab. and review.pt.) or meta-analysis as topic/ or Meta-Analysis.pt. (457475)
- 4 1 and 2 and 3 (320)
- 5 limit 4 to (english language and humans) (303)

#### Appendix 4. Hierarchy of evidence

---

|           |                                                                                    |
|-----------|------------------------------------------------------------------------------------|
| <b>1a</b> | Systematic reviews of randomised controlled trials                                 |
| <b>1b</b> | Individual randomised controlled trials                                            |
| <b>1c</b> | All or none randomised controlled trials                                           |
| <b>2a</b> | Systematic reviews of cohort studies                                               |
| <b>2b</b> | Individual cohort study or low quality randomised controlled trials                |
| <b>2c</b> | Outcomes' research; ecological studies                                             |
| <b>3a</b> | Systematic review of case-control studies                                          |
| <b>3b</b> | Individual case-control study                                                      |
| <b>4</b>  | Case series                                                                        |
| <b>5</b>  | Expert opinion without explicit critical appraisal/pre-clinical biomechanical data |

---



## Appendix 5. Reference list of included studies

1. Abram SGF, Hopewell S, Monk AP, Bayliss LE, Beard DJ, Price AJ. Arthroscopic partial meniscectomy for meniscal tears of the knee: a systematic review and meta-analysis. *Br J Sports Med.* 2020;54(11):652-63.
2. Bai DY, Liang L, Zhang BB, et al. Total disc replacement versus fusion for lumbar degenerative diseases - a meta-analysis of randomized controlled trials. *Medicine (Baltimore).* 2019;98(29):e16460.
3. Brignardello-Petersen R, Guyatt GH, Buchbinder R, et al. Knee arthroscopy versus conservative management in patients with degenerative knee disease: a systematic review. *BMJ Open.* 2017;7(5):e016114.
4. Bydon M, De la Garza-Ramos R, Macki M, Baker A, Gokaslan AK, Bydon A. Lumbar fusion versus nonoperative management for treatment of discogenic low back pain: a systematic review and meta-analysis of randomized controlled trials. *J Spinal Disord Tech.* 2014;27(5):297-304.
5. Chen L, Duan X, Huang X, Lv J, Peng K, Xiang Z. Effectiveness and safety of endoscopic versus open carpal tunnel decompression. *Arch Orthop Trauma Surg.* 2014;134(4):585-93.
6. Hiratzka J, Rastegar F, Contag AG, Norvell DC, Anderson PA, Hart RA. Adverse Event Recording and Reporting in Clinical Trials Comparing Lumbar Disk Replacement with Lumbar Fusion: A Systematic Review. *Global Spine J.* 2015;5(6):486-95.
7. Hu K, Zhang T, Xu W. Intraindividual comparison between open and endoscopic release in bilateral carpal tunnel syndrome: a meta-analysis of randomized controlled trials. *Brain Behav.* 2016;6(3):e00439.
8. Jacobs W, Van der Gaag NA, Tuschel A, et al. Total disc replacement for chronic back pain in the presence of disc degeneration. *Cochrane Database Syst Rev.* 2012(9):CD008326.
9. Ji X, Bi C, Wang F, Wang Q. Arthroscopic versus mini-open rotator cuff repair: an up-to-date meta-analysis of randomized controlled trials. *Arthroscopy.* 2015;31(1):118-24.
10. Jiang Y, Zhang K, Die J, Shi Z, Zhao H, Wang K. A systematic review of modern metal-on-metal total hip resurfacing vs standard total hip arthroplasty in active young patients. *J Arthroplasty.* 2011;26(3):419-26.
11. Karjalainen TV, Jain NB, Heikkinen J, Johnston RV, Page CM, Buchbinder R. Surgery for rotator cuff tears. *Cochrane Database Syst Rev.* 2019;12:CD013502.
12. Karjalainen TV, Jain NB, Page CM, et al. Subacromial decompression surgery for rotator cuff disease. *Cochrane Database Syst Rev.* 2019;1:CD005619.
13. Khan M, Evaniew N, Bedi A, Ayeni OR, Bhandari M. Arthroscopic surgery for degenerative tears of the meniscus: a systematic review and meta-analysis. *CMAJ.* 2014;186(14):1057-64.
14. Kovacs FM, Urrutia G, Alarcon JD. Surgery versus conservative treatment for symptomatic lumbar spinal stenosis: a systematic review of randomized controlled trials. *Spine (Phila Pa 1976).* 2011;36(20):E1335-51.
15. Lahdeoja T, Karjalainen T, Jokihaara J, et al. Subacromial decompression surgery for adults with shoulder pain: a systematic review with meta-analysis. *Br J Sports Med.* 2020;54(11):665-73.
16. Lee DY, Park YJ, Kim HJ, et al. Arthroscopic meniscal surgery versus conservative management in patients aged 40 years and older: a meta-analysis. *Arch Orthop Trauma Surg.* 2018;138(12):1731-9.
17. Li A, Li X, Zhong Y. Is minimally invasive superior than open transforaminal lumbar interbody fusion for single-level degenerative lumbar diseases: a meta-analysis. *J Orthop Surg Res.* 2018;13(1):241.
18. Li G, Kong L, Kou N, et al. The comparison of limited-incision versus standard-incision in treatment of carpal tunnel syndrome: A meta-analysis of randomized controlled trials. *Medicine (Baltimore).* 2019;98(18):e15372.
19. Li M, Yang H, Wang G. Interspinous process devices for the treatment of neurogenic intermittent claudication: a systematic review of randomized controlled trials. *Neurosurg Rev.* 2017;40(4):529-36.
20. Li YZ, Sun P, Chen D, Tang L, Chen CH, Wu AM. Artificial Total Disc Replacement Versus Fusion for Lumbar Degenerative Disc Disease: An Update Systematic Review and Meta-Analysis. *Turk Neurosurg.* 2020;30(1):1-10.
21. Lien-Iversen T, Morgan DB, Jensen C, Risberg MA, Engebretsen L, Viberg B. Does surgery reduce knee osteoarthritis, meniscal injury and subsequent complications compared with non-surgery after ACL rupture with at least 10 years follow-up? A systematic review and meta-analysis. *Br J Sports Med.* 2020;54(10):592-8.
22. Ma XL, Zhao XW, Ma JX, Li F, Wang Y, Lu B. Effectiveness of surgery versus conservative treatment for lumbar spinal stenosis: A system review and meta-analysis of randomized controlled trials. *Int J Surg.* 2017;44:329-38.
23. Machado GC, Ferreira PH, Yoo RI, et al. Surgical options for lumbar spinal stenosis. *Cochrane Database Syst Rev.* 2016;11:CD012421.
24. Miller LE, Bhattacharyya S, Pracyk J. Minimally Invasive Versus Open Transforaminal Lumbar Interbody Fusion for Single-Level Degenerative Disease: A Systematic Review and Meta-Analysis of Randomized Controlled Trials. *World Neurosurg.* 2020;133:358-65 e4.
25. Mo Z, Zhang R, Chang M, Tang S. Exercise therapy versus surgery for lumbar spinal stenosis: A systematic review and meta-analysis. *Pak J Med Sci.* 2018;34(4):879-85.
26. Monk AP, Davies LJ, Hopewell S, Harris K, Beard DJ, Price AJ. Surgical versus conservative interventions for treating anterior cruciate ligament injuries. *Cochrane Database Syst Rev.* 2016;4:CD011166.
27. Nazari G, MacDermid JC, Bryant D, Athwal GS. The effectiveness of surgical vs conservative interventions on pain and function in patients with shoulder impingement syndrome. A systematic review and meta-analysis. *PLoS One.* 2019;14(5):e0216961.
28. Nie H, Chen G, Wang X, Zeng J. Comparison of Total Disc Replacement with lumbar fusion: a meta-analysis of randomized controlled trials. *J Coll Physicians Surg Pak.* 2015;25(1):60-7.

29. Overdeest GM, Jacobs W, Vleggeert-Lankamp C, Thome C, Gunzburg R, Peul W. Effectiveness of posterior decompression techniques compared with conventional laminectomy for lumbar stenosis. *Cochrane Database Syst Rev*. 2015(3):CD010036.
30. Poetscher AW, Gentil AF, Ferretti M, Lenza M. Interspinous process devices for treatment of degenerative lumbar spine stenosis: A systematic review and meta-analysis. *PLoS One*. 2018;13(7):e0199623.
31. Rao MJ, Cao SS. Artificial total disc replacement versus fusion for lumbar degenerative disc disease: a meta-analysis of randomized controlled trials. *Arch Orthop Trauma Surg*. 2014;134(2):149-58.
32. Sanati KA, Mansouri M, Macdonald D, Ghafghazi S, Macdonald E, Yadegarfar G. Surgical techniques and return to work following carpal tunnel release: a systematic review and meta-analysis. *J Occup Rehabil*. 2011;21(4):474-81.
33. Sayegh ET, Strauch RJ. Open versus endoscopic carpal tunnel release: a meta-analysis of randomized controlled trials. *Clin Orthop Relat Res*. 2015;473(3):1120-32.
34. Schemitsch C, Chahal J, Vicente M, et al. Surgical repair versus conservative treatment and subacromial decompression for the treatment of rotator cuff tears: a meta-analysis of randomized trials. *Bone Joint J*. 2019;101-B(9):1100-6.
35. Shen J, Xu S, Xu S, Ye S, Hao J. Fusion or Not for Degenerative Lumbar Spinal Stenosis: A Meta-Analysis and Systematic Review. *Pain Physician*. 2018;21(1):1-8.
36. Skou ST, Roos EM, Laursen MB, et al. A Randomized, Controlled Trial of Total Knee Replacement. *N Engl J Med*. 2015;373(17):1597-606.
37. Smith TO, Nichols R, Donell ST, Hing CB. The clinical and radiological outcomes of hip resurfacing versus total hip arthroplasty: a meta-analysis and systematic review. *Acta Orthop*. 2010;81(6):684-95.
38. Smith TO, Postle K, Penny F, McNamara I, Mann CJ. Is reconstruction the best management strategy for anterior cruciate ligament rupture? A systematic review and meta-analysis comparing anterior cruciate ligament reconstruction versus non-operative treatment. *Knee*. 2014;21(2):462-70.
39. Springer BD, Connelly SE, Odum SM, et al. Cementless femoral components in young patients: review and meta-analysis of total hip arthroplasty and hip resurfacing. *J Arthroplasty*. 2009;24(6 Suppl):2-8.
40. Thoma A, Veltri K, Haines T, Duku E. A meta-analysis of randomized controlled trials comparing endoscopic and open carpal tunnel decompression. *Plast Reconstr Surg*. 2004;114(5):1137-46.
41. Thorlund JB, Juhl CB, Roos EM, Lohmander LS. Arthroscopic surgery for degenerative knee: systematic review and meta-analysis of benefits and harms. *Br J Sports Med*. 2015;49(19):1229-35.
42. van de Graaf VA, Wolterbeek N, Mutsaerts EL, et al. Arthroscopic Partial Meniscectomy or Conservative Treatment for Nonobstructive Meniscal Tears: A Systematic Review and Meta-analysis of Randomized Controlled Trials. *Arthroscopy*. 2016;32(9):1855-65 e4.
43. Vasiliadis HS, Georgoulas P, Shrier I, Salanti G, Scholten RJ. Endoscopic release for carpal tunnel syndrome. *Cochrane Database Syst Rev*. 2014(1):CD008265.
44. Verdugo RJ, Salinas RA, Castillo JL, Cea JG. Surgical versus non-surgical treatment for carpal tunnel syndrome. *Cochrane Database Syst Rev*. 2008(4):CD001552.
45. Wang X, Wanyan P, Tian JH, Hu L. Meta-analysis of randomized trials comparing fusion surgery to non-surgical treatment for discogenic chronic low back pain. *J Back Musculoskelet Rehabil*. 2015;28(4):621-7.
46. Wei J, Song Y, Sun L, Lv C. Comparison of artificial total disc replacement versus fusion for lumbar degenerative disc disease: a meta-analysis of randomized controlled trials. *Int Orthop*. 2013;37(7):1315-25.
47. Xu C, Zhao J. A meta-analysis comparing meniscal repair with meniscectomy in the treatment of meniscal tears: the more meniscus, the better outcome? *Knee Surg Sports Traumatol Arthrosc*. 2015;23(1):164-70.
48. Xu S, Wang J, Liang Y, et al. Decompression with fusion is not in superiority to decompression alone in lumbar stenosis based on randomized controlled trials: A PRISMA-compliant meta-analysis. *Medicine (Baltimore)*. 2019;98(46):e17849.
49. Yajun W, Yue Z, Xiuxin H, Cui C. A meta-analysis of artificial total disc replacement versus fusion for lumbar degenerative disc disease. *Eur Spine J*. 2010;19(8):1250-61.
50. Yang LH, Liu W, Li J, et al. Lumbar decompression and lumbar interbody fusion in the treatment of lumbar spinal stenosis: A systematic review and meta-analysis. *Medicine (Baltimore)*. 2020;99(27):e20323.
51. Zaina F, Tomkins-Lane C, Carragee E, Negrini S. Surgical versus non-surgical treatment for lumbar spinal stenosis. *Cochrane Database Syst Rev*. 2016(1):CD010264.
52. Zhao XW, Ma JX, Ma XL, et al. Interspinous process devices (IPD) alone versus decompression surgery for lumbar spinal stenosis (LSS): A systematic review and meta-analysis of randomized controlled trials. *Int J Surg*. 2017;39:57-64.
53. Zigler J, Gornet MF, Ferko N, Cameron C, Schranck FW, Patel L. Comparison of Lumbar Total Disc Replacement With Surgical Spinal Fusion for the Treatment of Single-Level Degenerative Disc Disease: A Meta-Analysis of 5-Year Outcomes From Randomized Controlled Trials. *Global Spine J*. 2018;8(4):413-23.
54. Zuo D, Zhou Z, Wang H, et al. Endoscopic versus open carpal tunnel release for idiopathic carpal tunnel syndrome: a meta-analysis of randomized controlled trials. *J Orthop Surg Res*. 2015;10:12.

## Appendix 6. Characteristics of included meta-analyses or relevant studies

| Procedure                                                     | Journal title                                   | Last search date | Databases searched                                                                                                                                                                                                                                                                                                  | No. of RCTs included | Intervention                          | Comparator                                                        | Condition                   | Key findings                                                                                                                                                                                                                                                                                                                                                                                                                                                                                                                                      | GRADE results                       |
|---------------------------------------------------------------|-------------------------------------------------|------------------|---------------------------------------------------------------------------------------------------------------------------------------------------------------------------------------------------------------------------------------------------------------------------------------------------------------------|----------------------|---------------------------------------|-------------------------------------------------------------------|-----------------------------|---------------------------------------------------------------------------------------------------------------------------------------------------------------------------------------------------------------------------------------------------------------------------------------------------------------------------------------------------------------------------------------------------------------------------------------------------------------------------------------------------------------------------------------------------|-------------------------------------|
| <b>Arthroscopic anterior cruciate ligament reconstruction</b> |                                                 |                  |                                                                                                                                                                                                                                                                                                                     |                      |                                       |                                                                   |                             |                                                                                                                                                                                                                                                                                                                                                                                                                                                                                                                                                   |                                     |
| Lien-Iversen, 2020                                            | British Journal of Sports Medicine              | Oct, 2018        | EMBASE, MEDLINE, CINAHL, CENTRAL                                                                                                                                                                                                                                                                                    | 1                    | Minimally invasive ACL reconstruction | Non-surgical treatment                                            | ACL rupture                 | The risk of radiographic knee OA was higher (RR 1.42; 95% CI 1.09 to 1.85; p=0.009), but the risk of secondary meniscectomy was lower (RR 0.34; 95% CI 0.20 to 0.58; p<0.001) ten years after surgical treatment of ACL rupture. The risk of graft rupture/secondary ACL revision or secondary reconstruction was unrelated to treatment type (RR 0.90; 95% CI 0.49 to 1.66; p=0.74). The degree of knee laxity was reduced after surgical treatment in comparison with non-surgical treatment (p=0.013), while PROMs were similar (KOOS: p=0.35) | Not used                            |
| Monk, 2016                                                    | Cochrane Database of Systematic Reviews         | Jan, 2016        | Cochrane Bone Joint and Muscle Trauma Group Specialised Register, CENTRAL, MEDLINE In-Process and Other Non-Indexed Citations, EMBASE, WHO ICTRP, ClinicalTrials.gov AMED, CINAHL, EMBASE, PubMed, psycINFO, MEDLINE, CENTRAL, OpenGrey, WHO ICRT, Current Controlled Trials, UK National Research Register Archive | 1                    | ACL reconstruction                    | Non-surgical treatment                                            | ACL rupture                 | No difference between surgical management (ACL reconstruction followed by structured rehabilitation) and conservative treatment (structured rehabilitation only) in patient-reported outcomes (KOOS) of knee function at two (MD -0.20; 95% CI -6.78 to 6.38) and five years (MD -2.00; 95% CI -8.27 to 4.27) after injury                                                                                                                                                                                                                        | Very low to low certainty evidence  |
| Smith, 2014                                                   | The Knee                                        | Apr, 2013        | CENTRAL, OpenGrey, WHO ICRT, Current Controlled Trials, UK National Research Register Archive                                                                                                                                                                                                                       | 1                    | ACL reconstruction                    | Non-surgical treatment                                            | ACL rupture                 | Limited difference in clinical outcomes (KOOS (ADL)) between people managed non-operatively versus with an isolated ACL reconstruction following ACL rupture (MD -1.89; 95% CI -2.24 to -1.55; p<0.001). Lower incidence of partial meniscectomy at longer-term follow-up (ten years and over) (MD 0.18; 95% CI 0.07 to 0.46; p<0.001)                                                                                                                                                                                                            | Not used                            |
| <b>Arthroscopic meniscal repair</b>                           |                                                 |                  |                                                                                                                                                                                                                                                                                                                     |                      |                                       |                                                                   |                             |                                                                                                                                                                                                                                                                                                                                                                                                                                                                                                                                                   |                                     |
| Xu, 2015                                                      | Knee Surgery, Sports, Traumatology, Arthroscopy | Mar, 2012        | MEDLINE, EMBASE, Ovid                                                                                                                                                                                                                                                                                               | 1                    | Open or arthroscopic meniscal repair  | Arthroscopic total or partial meniscectomy                        | Meniscal tears              | Meniscal repairs have better long-term patient-reported outcomes and better activity levels than meniscectomy (IKDC: OR 0.36; 95% CI 0.02 to 6.13; p=0.48; Tenger: MD -0.81; 95% CI -1.13 to -0.49; p<0.001); besides, the former meniscal repairs have a lower failure rate (MD 0.27; 95% CI 0.08 to 0.91; p=0.03)                                                                                                                                                                                                                               | Not used                            |
| <b>Arthroscopic partial meniscectomy</b>                      |                                                 |                  |                                                                                                                                                                                                                                                                                                                     |                      |                                       |                                                                   |                             |                                                                                                                                                                                                                                                                                                                                                                                                                                                                                                                                                   |                                     |
| Abram, 2020                                                   | British Journal of Sports Medicine              | Oct, 2018        | MEDLINE, EMBASE, CENTRAL, Scopus, Web of Science, ISRCTN, ClinicalTrials.gov                                                                                                                                                                                                                                        | 10                   | Arthroscopic partial meniscectomy     | Non-surgical treatment or sham surgery or placebo or no treatment | Degenerative meniscal tears | Performing APM in all patients with knee pain and a meniscal tear is not appropriate, and surgical treatment should not be considered the first-line intervention. There may, however, be a small-to-moderate benefit from APM compared with physiotherapy for patients without OA (KOOS (pain, 6-12 months): MD 6.91; 95% CI 2.87 to 10.94; p=0.03; KOOS (function, 6-12 months): MD 5.31; 95% CI 1.12 to 9.51; p=0.01)                                                                                                                          | Very low to high certainty evidence |

| Procedure<br>First author,<br>year      | Journal title                              | Last search<br>date | Databases searched                                                       | No. of<br>RCTs<br>included | Intervention                                      | Comparator                                                                  | Condition                                              | Key findings                                                                                                                                                                                                                                                                                                                                                                                                                                                                                                                                                                               | GRADE<br>results                        |
|-----------------------------------------|--------------------------------------------|---------------------|--------------------------------------------------------------------------|----------------------------|---------------------------------------------------|-----------------------------------------------------------------------------|--------------------------------------------------------|--------------------------------------------------------------------------------------------------------------------------------------------------------------------------------------------------------------------------------------------------------------------------------------------------------------------------------------------------------------------------------------------------------------------------------------------------------------------------------------------------------------------------------------------------------------------------------------------|-----------------------------------------|
| Brignardello-Petersen, 2017             | BMJ Open                                   | Aug, 2016           | MEDLINE, EMBASE, CENTRAL, Google Scholar, OpenGrey                       | 15                         | Arthroscopic debridement +/- partial meniscectomy | Non-surgical treatment (exercise therapy, injections, drugs, sham surgery)  | Symptomatic degenerative knee disease                  | Over the long term, patients who undergo knee arthroscopy versus those who receive conservative management strategies do not have important benefits in pain (MD 3.1; 95% CI -0.2 to 6.4) or function (MD 3.2; 95% CI -0.5 to 6.8) at two years                                                                                                                                                                                                                                                                                                                                            | Low to high certainty evidence          |
| Khan, 2014                              | Canadian Medical Association Journal       | Jan, 2014           | MEDLINE, EMBASE, CENTRAL, PubMed, ClinicalTrials.gov                     | 7                          | Arthroscopic meniscal debridement                 | Non-surgical treatment or sham treatments                                   | Degenerative meniscal tears                            | There is moderate evidence to suggest that there is no benefit to arthroscopic meniscal debridement for degenerative meniscal tears in comparison with nonoperative or sham treatments in middle-aged patients with mild or no concomitant OA (KOOS (function, two years): MD 1.6; 95% CI -2.2 to 5.2); VAS (pain, two years): MD -0.06; 95% CI -0.28 to -0.15)                                                                                                                                                                                                                            | Not used                                |
| Lee, 2018                               | Archives of Orthopaedic and Trauma Surgery | Aug, 2017           | MEDLINE, EMBASE, CENTRAL, Web of Science, Scopus                         | 9                          | Arthroscopic meniscal debridement                 | Non-surgical treatment                                                      | Degenerative meniscal tears in patients aged $\geq 40$ | The efficacy of arthroscopic surgery was not superior to conservative management in this type of patients (pain: SMD 0.01; 95% CI -0.15 to 0.19; p=0.86; function: SMD 0.01; 95% CI -0.19 to 0.21; p=0.93)                                                                                                                                                                                                                                                                                                                                                                                 | Not used                                |
| Thorlund, 2015                          | British Journal of Sports Medicine         | Aug, 2014           | MEDLINE, EMBASE, CINAHL, Web of Science, CENTRAL                         | 9                          | Arthroscopic debridement +/- partial meniscectomy | Non-surgical treatment or sham surgery                                      | Degenerative knee disease                              | There is a small inconsequential benefit (VAS (pain, three months): SMD 0.27; 95% CI 0.14 to 0.41) from interventions that include arthroscopy for the degenerative knee, but this benefit is absent at one to two years after surgery (VAS (pain, two years): SMD 0.06; 95% CI -0.13 to 0.25; VAS (function, two years): SMD -0.02; 95% CI -0.25 to 0.20). Knee arthroscopy is associated with harms. These findings do not support arthroscopic surgery for middle-aged/older patients with knee pain with or without OA                                                                 | Not used                                |
| van de Graaf, 2016                      | Arthroscopy                                | May, 2016           | CENTRAL, MEDLINE, EMBASE, Physiotherapy Evidence Database, NHS CRD       | 6                          | Arthroscopic partial meniscectomy                 | Non-surgical treatment                                                      | Degenerative meniscal tears                            | Small statistically significant favourable results of APM up to six months for physical function and pain (LKSS (three months): MD 3.31; 95% CI 0.69 to 5.93; p=0.01; WOMAC (function, 6 months): MD 3.56; 95% CI 0.24, 6.88; p=0.04). However, no differences at longer follow-up (WOMAC (function, 12 months): MD 1.14; 95% CI -2.01 to 4.30; p=0.48; LKSS (24 months): MD -1.14; 95% CI -3.72 to 1.45; p=0.39)                                                                                                                                                                          | Very low to high certainty evidence     |
| <b>Arthroscopic rotator cuff repair</b> |                                            |                     |                                                                          |                            |                                                   |                                                                             |                                                        |                                                                                                                                                                                                                                                                                                                                                                                                                                                                                                                                                                                            |                                         |
| Ji, 2015                                | Arthroscopy                                | Oct, 2013           | PubMed, EMBASE, Scopus, CENTRAL, Cochrane Database of Systematic Reviews | 5                          | Arthroscopic rotator cuff repair                  | Mini-open rotator cuff repair                                               | Rotator cuff tear                                      | No differences in surgery time (MD 17.64; 95% CI -3.87 to 39.16; p=0.11), function (MD 1.10; 95% CI -3.59 to 5.79); p=0.85), VAS (pain) (MD 0.01; 95% CI -0.21 to 0.22; p=0.96), and range of motion (MD 3.19; 95% CI -1.44 to 7.81; p=0.18) at the end of follow-up between the arthroscopic and mini-open rotator cuff repair techniques. In addition, there was no significant difference in VAS pain score in the early phase between the two repairs (MD -0.10; -1.43 to 1.24; p=0.89)                                                                                                | Not used                                |
| Karjalainen, 2019                       | Cochrane Database of Systematic Reviews    | Jan, 2019           | CENTRAL, MEDLINE, EMBASE, WHO ICRT, ClinicalTrials.gov                   | 9                          | Surgical treatment                                | Non-surgical treatment (exercises with or without glucocorticoid injection) | Rotator cuff tear (full thickness)                     | Uncertain whether rotator cuff repair surgery provides clinically meaningful benefits to people with symptomatic tears; it may provide little/no clinically important benefits for pain (MD -0.76; 95% CI -1.20 to -0.32; p<0.001), function (MD 2.83; 95% CI -1.16 to 6.83; p=0.16), overall quality of life or participant-rated global assessment of treatment success (RR 1.06; 95% CI 0.95 to 1.19) when compared with non-operative treatment beyond 12 months. Surgery may not improve shoulder pain or function compared with exercises, with or without glucocorticoid injections | Very low to moderate certainty evidence |

| Procedure<br>First author,<br>year            | Journal title                              | Last search date | Databases searched                                                             | No. of RCTs included | Intervention                                                                    | Comparator                                                    | Condition                                | Key findings                                                                                                                                                                                                                                                                                                                                                                                                                                                                        | GRADE results                       |
|-----------------------------------------------|--------------------------------------------|------------------|--------------------------------------------------------------------------------|----------------------|---------------------------------------------------------------------------------|---------------------------------------------------------------|------------------------------------------|-------------------------------------------------------------------------------------------------------------------------------------------------------------------------------------------------------------------------------------------------------------------------------------------------------------------------------------------------------------------------------------------------------------------------------------------------------------------------------------|-------------------------------------|
| Schemitsch, 2019                              | The Bone and Joint Journal                 | Mar, 2018        | PubMed, MEDLINE, CENTRAL                                                       | 6                    | Surgical treatment (mini-open, open, or arthroscopic)                           | Non-surgical treatment or subacromial decompression alone     | Rotator cuff tear (chronic/degenerative) | Surgical repair results in significantly improved outcomes when compared with either conservative treatment (Constant-Murley: MD 6.15; 95% CI 2.24 to 10.07; p=0.002) or subacromial decompression alone (Constant-Murley: MD 5.81; 95% CI 2.58 to 9.04; p<0.001) for degenerative rotator cuff tears in older patients                                                                                                                                                             | Not used                            |
| <b>Arthroscopic subacromial decompression</b> |                                            |                  |                                                                                |                      |                                                                                 |                                                               |                                          |                                                                                                                                                                                                                                                                                                                                                                                                                                                                                     |                                     |
| Karjalainen, 2019                             | Cochrane Database of Systematic Reviews    | Oct, 2018        | CENTRAL, MEDLINE, ClinicalTrials.gov, WHO ICRT                                 | 8                    | Arthroscopic subacromial decompression                                          | Placebo surgery, no intervention or non-surgical intervention | Subacromial impingement syndrome         | No clinically important benefit of intervention over placebo in VAS pain (MD -0.36; 95% CI -0.84 to 0.33; p=0.39), function (MD 2.76; 95% CI -1.36 to 6.87; p=0.19), health related QOL (SMD -0.09; 95% CI -0.39 to 0.21; p=0.54) or participant-rated global assessment of treatment success (RR 1.08; 95% CI 0.93 to 1.27; p=0.32) at 12 months                                                                                                                                   | High certainty evidence             |
| Lahdeoja, 2020                                | British Journal of Sports Medicine         | Jul, 2018        | MEDLINE, EMBASE, PubMed, CENTRAL, CINAHL, PEDro, ClinicalTrials. Gov, WHO ICRT | 9                    | Open or arthroscopic subacromial decompression plus postoperative physiotherapy | Placebo surgery or exercise therapy                           | Subacromial pain syndrome                | No clinically important benefit of intervention compared with placebo surgery or exercise therapy in VAS pain (MD -0.26; 95% CI -0.84 to 0.33; p=0.39), Constant function (MD 2.75; 95% CI -1.36 to 6.87; p=0.19) or EQ-5D health related QOL (SMD -0.09; 95% CI -0.39 to 0.21; p=0.54) at 12 months                                                                                                                                                                                | Moderate to high certainty evidence |
| Nazari, 2019                                  | Plos One                                   | Nov, 2018        | MEDLINE, EMBASE, CINAHL, PubMed                                                | 11                   | Open or arthroscopic subacromial decompression plus postoperative physiotherapy | Placebo surgery plus physiotherapy or physiotherapy only      | Subacromial impingement syndrome         | No clinically important benefit of intervention plus physiotherapy over physiotherapy in VAS pain (MD 1.00; 95% CI -0.24 to 2.24; p=0.11) and function (SMD 0.22; 95% CI -0.12 to 0.56; p=0.21) at any time point up to ten years                                                                                                                                                                                                                                                   | Low to moderate certainty evidence  |
| <b>Carpal tunnel decompression</b>            |                                            |                  |                                                                                |                      |                                                                                 |                                                               |                                          |                                                                                                                                                                                                                                                                                                                                                                                                                                                                                     |                                     |
| Chen, 2014                                    | Archives of Orthopaedic and Trauma Surgery | Dec, 2012        | CENTRAL, PubMed, EMBASE                                                        | 15                   | Open carpal tunnel release                                                      | Endoscopic carpal tunnel release                              | Carpal tunnel syndrome                   | Endoscopic and open release were similar in relief of symptoms (RR 1.02; 95% CI 0.92 to 1.14; p=0.71) after three months. Endoscopic release resulted in a better recovery of function (grip strength: MD 1.96; 95% CI -0.47 to 4.38; p=0.11; pinch strength: MD 0.93; 95% CI 0.31 to 1.35; p=0.002) and earlier return to work (MD -8.21; 95% CI -9.79 to -6.63; p<0.001) and was determined to be safer than open release                                                         | Not used                            |
| Hu, 2016                                      | Brain and Behaviour                        | Jun, 2015        | PubMed, EMBASE, MEDLINE, CENTRAL, Association Annual Congress                  | 5                    | Open carpal tunnel release in one wrist                                         | Endoscopic carpal tunnel release in the other wrist           | Bilateral carpal tunnel syndrome         | Endoscopic release promoted better recovery of daily life functions (MD 0.13; 95% CI 0.02 to 0.25; p=0.02) but required a longer operative time (MD -1.27; 95% CI -2.22 to -0.33; p=0.008). No difference in VAS pain (MD 0.02; 95% CI -0.08 to 0.11; p=0.75), grip strength (MD 0.17; 95% CI -2.03 to 2.37; p=0.89) and complication rates (RD 0.01; 95% CI -0.02 to 0.05; p=0.47)                                                                                                 | Not used                            |
| Li, 2019                                      | Medicine (Baltimore)                       | Jun, 2017        | MEDLINE, Web of Science, EMBASE                                                | 13                   | Limited incision carpal tunnel release                                          | Standard incision carpal tunnel release                       | Carpal tunnel syndrome                   | Limited incision release allows earlier to return to activities (MD -8.80; 95% CI -9.21 to -8.39; p<0.001), reduces operative time (MD -1.68; 95% CI -3.24 to -0.12; p=0.04), decreases rate of adverse events (RR 0.61; 95% CI 0.38 to 0.96; p=0.03), and improves strength (grip: MD 4.25; 95% CI 0.86 to 7.65; p=0.01; pinch: MD 1.37; 95% CI 0.24 to 2.51; p=0.02) during the early postoperative period. Results at six months or longer are similar according to current data | Not used                            |

| Procedure<br>First author,<br>year | Journal title                               | Last<br>search<br>date | Databases searched                                                                                                                                                                   | No. of<br>RCTs<br>included | Intervention                             | Comparator                                                      | Condition              | Key findings                                                                                                                                                                                                                                                                                                                                                                                                                                                                                                                                                                                                                                                                                                                                                                                                                                                                                                                                                                                                                                                  | GRADE<br>results                   |
|------------------------------------|---------------------------------------------|------------------------|--------------------------------------------------------------------------------------------------------------------------------------------------------------------------------------|----------------------------|------------------------------------------|-----------------------------------------------------------------|------------------------|---------------------------------------------------------------------------------------------------------------------------------------------------------------------------------------------------------------------------------------------------------------------------------------------------------------------------------------------------------------------------------------------------------------------------------------------------------------------------------------------------------------------------------------------------------------------------------------------------------------------------------------------------------------------------------------------------------------------------------------------------------------------------------------------------------------------------------------------------------------------------------------------------------------------------------------------------------------------------------------------------------------------------------------------------------------|------------------------------------|
| Sanati, 2011                       | Journal of Occupational Rehabilitation      | Dec, 2009              | CENTRAL, MEDLINE, AMED, CINAHL                                                                                                                                                       | 15                         | Minimally invasive carpal tunnel release | Open carpal tunnel release                                      | Carpal tunnel syndrome | Minimally invasive surgery resulted in earlier return to work (MD -7.22; 95% CI -10.01 to -4.43; p=0.36)                                                                                                                                                                                                                                                                                                                                                                                                                                                                                                                                                                                                                                                                                                                                                                                                                                                                                                                                                      | Not used                           |
| Sayegh, 2015                       | Clinical Orthopaedics and Related Research  | Apr, 2014              | MEDLINE, CINAHL, CENTRAL                                                                                                                                                             | 21                         | Open carpal tunnel release               | Endoscopic carpal tunnel release                                | Carpal tunnel syndrome | Endoscopic release allows earlier return to work (MD -8.73; 95% CI -12.82 to -4.65; p<0.001) and improved strength during the early postoperative period but non-significant at six months (grip: MD 0.90; 95% CI -1.47 to 3.27; p=0.46; pinch: MD 0.37; 95% CI -0.09 to 0.84; p=0.12). Results at six months or later are similar according to current data except that patients undergoing endoscopic release are at greater risk of nerve injury (RR 2.84; 95% CI 1.08 to 7.46; p=0.03) and lower risk of scar tenderness (RR 0.53; 95% CI 0.35 to 0.82; p=0.01) compared with open release<br>Endoscopic release is favourable for grip (SMD 0.68; 95% CI 0.06 to 1.30; p=0.01) and pinch (SMD 0.38; 95% CI 0.09 to 0.66; p=0.69) strength at short-term follow-up. Results are inconclusive in terms of pain (OR 3.09; 95% CI 0.69 to 13.80; p<0.001) and return to work (OR 1.52; 95% CI 0.28 to 8.34; p<0.001). Reversible nerve damage was three times as likely to occur with endoscopic release as with open (OR 0.33; 95% CI 0.12 to 0.91; p=0.98) | Not used                           |
| Thoma, 2004                        | Plastic and Reconstructive Surgery          | 2002                   | CENTRAL, MEDLINE, EMBASE, CINAHL, HealthSTAR                                                                                                                                         | 13                         | Open carpal tunnel release               | Endoscopic carpal tunnel release                                | Carpal tunnel syndrome | Open and endoscopic release for CTS are about as effective as each other in relieving symptoms (SMD -0.13; 95% CI -0.47 to -0.21; p=0.45) and improving functional status (SMD -0.23; 95% CI -0.60 to 0.14; p=0.22), although there may be a functionally significant benefit of endoscopic over open in improvement in grip strength (SMD 0.36; 95% CI 0.09 to 0.63; p=0.008). Endoscopic appears to be associated with fewer minor complications (RR 0.55; 95% CI 0.38 to 0.81; p=0.003) compared to open, but we found no difference in the rates of major complications. Return to work is faster after endoscopic release (MD -4.89; 95% CI -11.35 to 1.57)                                                                                                                                                                                                                                                                                                                                                                                              | Not used                           |
| Vasiliadis, 2014                   | Cochrane Database of Systematic Reviews     | Nov, 2013              | CENTRAL, MEDLINE, EMBASE, Cochrane Neuromuscular Disease Group Trials Register, ClinicalTrial.gov, Current Controlled Trials, Wellcome Trust, UK Clinical Trials Gateway, WHO ICRTTP | 28                         | Endoscopic carpal tunnel release         | Alternative carpal tunnel release                               | Carpal tunnel syndrome | Surgical treatment of carpal tunnel syndrome relieves symptoms significantly better than splinting (RR 1.23; 95% CI 1.04 to 1.46). Further research is needed to discover whether this conclusion applies to people with mild symptoms and whether surgical treatment is better than steroid injection<br>Although ECTR significantly reduced postoperative hand pain (RR 0.70; 95% CI 0.53 to 0.93; p=0.02), it increased the possibility of reversible postoperative nerve injury (RR 2.38; 95% CI 0.98 to 5.77; p=0.05) in patients with idiopathic CTS. No statistical difference in the overall complication rate (RR 1.34; 95% CI 0.74 to 2.43; p=0.34), subjective satisfaction (RR 1.00; 95% CI 0.93 to 1.08; p=0.92), the time to return to work (MD -3.52; 95% CI -8.15 to 1.10; p=0.14), postoperative grip (MD 2.39; 95% CI -0.93 to 5.73; p=0.16) and pinch (MD -0.53; 95% CI -3.16 to 2.11; =0.70) strength, and operative time (MD -4.00, 95% CI -8.01 to 0.00; p=0.05) was observed between the two groups                                    | Very low to low certainty evidence |
| Verdugo, 2008                      | Cochrane Database of Systematic Reviews     | Jan, 2008              | Cochrane Neuromuscular Disease Group Trials Register, MEDLINE, EMBASE, LILACS                                                                                                        | 4                          | Surgical treatment                       | Non-surgical treatment (splinting or corticosteroid injections) | Carpal tunnel syndrome | Surgical treatment of carpal tunnel syndrome relieves symptoms significantly better than splinting (RR 1.23; 95% CI 1.04 to 1.46). Further research is needed to discover whether this conclusion applies to people with mild symptoms and whether surgical treatment is better than steroid injection                                                                                                                                                                                                                                                                                                                                                                                                                                                                                                                                                                                                                                                                                                                                                        | Not used                           |
| Zuo, 2015                          | Journal of Orthopaedic Surgery and Research | Sep, 2013              | Google Scholar, MEDLINE, EMBASE, CENTRAL                                                                                                                                             | 13                         | Open carpal tunnel release               | Endoscopic carpal tunnel release                                | Carpal tunnel syndrome | Although ECTR significantly reduced postoperative hand pain (RR 0.70; 95% CI 0.53 to 0.93; p=0.02), it increased the possibility of reversible postoperative nerve injury (RR 2.38; 95% CI 0.98 to 5.77; p=0.05) in patients with idiopathic CTS. No statistical difference in the overall complication rate (RR 1.34; 95% CI 0.74 to 2.43; p=0.34), subjective satisfaction (RR 1.00; 95% CI 0.93 to 1.08; p=0.92), the time to return to work (MD -3.52; 95% CI -8.15 to 1.10; p=0.14), postoperative grip (MD 2.39; 95% CI -0.93 to 5.73; p=0.16) and pinch (MD -0.53; 95% CI -3.16 to 2.11; =0.70) strength, and operative time (MD -4.00, 95% CI -8.01 to 0.00; p=0.05) was observed between the two groups                                                                                                                                                                                                                                                                                                                                              | Not used                           |

#### Lumbar spine decompression

| Procedure<br>First author,<br>year | Journal title                                    | Last<br>search<br>date | Databases searched                                                                                                                                                                       | No. of<br>RCTs<br>included | Intervention                                                                                                                                                         | Comparator                                                                                 | Condition                                                                                     | Key findings                                                                                                                                                                                                                                                                                                                                                                                                                                                                                                                                                | GRADE<br>results                            |
|------------------------------------|--------------------------------------------------|------------------------|------------------------------------------------------------------------------------------------------------------------------------------------------------------------------------------|----------------------------|----------------------------------------------------------------------------------------------------------------------------------------------------------------------|--------------------------------------------------------------------------------------------|-----------------------------------------------------------------------------------------------|-------------------------------------------------------------------------------------------------------------------------------------------------------------------------------------------------------------------------------------------------------------------------------------------------------------------------------------------------------------------------------------------------------------------------------------------------------------------------------------------------------------------------------------------------------------|---------------------------------------------|
| Kovacs, 2011                       | Spine                                            | Jul,<br>2009           | CENTRAL,<br>MEDLINE, EMBASE<br>and TripDatabase                                                                                                                                          | 5                          | Surgical<br>treatment                                                                                                                                                | Non-surgical<br>treatment                                                                  | Degenerative<br>lumbar spinal<br>stenosis                                                     | In patients with symptomatic LSS, the implantation of a specific type of device or decompressive surgery, with or without fusion, is more effective than continued conservative treatment when the latter has failed for three to six months (ODI: MD -10.55; 95% CI -16.88 to -4.22; p=0.001)                                                                                                                                                                                                                                                              | Not used                                    |
| Li, 2017                           | Neurosurgical<br>Review                          | Dec,<br>2014           | MEDLINE, PubMed<br>and CENTRAL                                                                                                                                                           | 8                          | Interspinous<br>process device<br>implantation                                                                                                                       | Other treatment<br>options (non-<br>operative<br>therapy, or<br>laminectomy<br>+/- fusion) | Neurogenic<br>intermittent<br>claudication<br>secondary to<br>degenerative<br>spinal stenosis | IPD seems to be more effective than nonoperative treatment and also laminectomy combined with instrumented spinal fusion in treating NIC secondary to spinal stenosis or low-grade degenerative spondylolisthesis; however only limited meta-analysis was performed – more evidence is needed to confirm this. IPD implantation however is not superior to laminectomy and even resulted in a higher reoperation rate (RR 3.75; 95% CI 1.87 to 7.49)                                                                                                        | Not used                                    |
| Ma, 2017                           | International<br>Journal of<br>Surgery           | Sep,<br>2016           | PubMed, CENTRAL,<br>Ovid, MEDLINE,<br>China National<br>Knowledge database,<br>Wanfang database                                                                                          | 9                          | Surgical<br>treatment                                                                                                                                                | Non-surgical<br>treatment                                                                  | Degenerative<br>lumbar spinal<br>stenosis                                                     | Surgery groups showed better late clinical outcomes after one year (ODI (one year): MD -5.89; 95% CI -11.39 to -0.40; p=0.04; ODI (four years): MD -9.40; 95% CI -12.74 to -6.06; p<0.001) and higher complication rate (RR 2.85; 95% CI 1.37 to 5.92; p=0.005) throughout the follow-up duration, although it had no significant differences compared with conservative groups in the first six months post-treatment. However, there was no evidence that a definitive method could be firmly recommended to LSS patients                                 | Not used                                    |
| Machado,<br>2016                   | Cochrane<br>Database of<br>Systematic<br>Reviews | Jun,<br>2016           | Cochrane Back and<br>Neck Review Group<br>Trials Register,<br>CENTRAL,<br>MEDLINE,<br>EMBASE, CINAHL,<br>AMED, Web of<br>Science, LILACS,<br>ClinicalTrials.gov,<br>ANZCTR, WHO<br>ICTRP | 24                         | Surgical<br>treatment                                                                                                                                                | No treatment or<br>placebo or<br>sham surgery                                              | Degenerative<br>lumbar spinal<br>stenosis                                                     | There is a paucity of evidence on the efficacy of surgery for lumbar spinal stenosis, as to date no trials have compared surgery with no treatment, placebo or sham surgery. The results demonstrate that at present, decompression plus fusion and interspinous process spacers have not been shown to be superior to conventional decompression alone. Decompression alone versus decompression plus fusion (pain: MD 1.09; 95% CI -4.07 to 6.26; p=0.66). Decompression alone versus interspinous spacers (pain: MD -0.89; 95% CI -6.08 to 4.31; p=0.74) | Very low<br>certainty<br>evidence           |
| Mo, 2018                           | Pakistan<br>Journal of<br>Medical<br>Sciences    | Jun,<br>2017           | PubMed, CENTRAL,<br>Web of Science, Ovid,<br>PEDro                                                                                                                                       | 3                          | Exercise<br>therapy                                                                                                                                                  | Surgical<br>treatment                                                                      | Degenerative<br>lumbar spinal<br>stenosis                                                     | Exercise therapy had a similar effect for LSS as decompressive laminectomies (ODI (two years): MD -0.67; 95% CI -6.16 to 4.82; p=0.81; SF-36 (two years): MD 3.85; 95% CI 0.48 to 7.22; p=0.03)                                                                                                                                                                                                                                                                                                                                                             | Not used                                    |
| Overdevest,<br>2015                | Cochrane<br>Database of<br>Systematic<br>Reviews | Jun,<br>2014           | CENTRAL,<br>MEDLINE,<br>MEDLINE In-Process<br>and Other Non-<br>Indexed Citations,<br>EMBASE, Web of<br>Science, WHO<br>ICTRP,<br>ClinicalTrial.gov                                      | 10                         | Posterior<br>decompression<br>(unilateral<br>laminotomy for<br>bilateral<br>decompression,<br>bilateral<br>laminotomy and<br>split-spinous<br>process<br>laminotomy) | Conventional<br>laminectomy                                                                | Degenerative<br>lumbar spinal<br>stenosis                                                     | Evidence on functional disability, perceived recovery and leg pain is of low or very low quality. Therefore, further research is necessary to establish whether these techniques provide a safe and effective alternative for conventional laminectomy (ODI: MD -1.68; 95% CI -8.50 to 5.13; p=0.63; pain: MD -1.07; 95% CI -2.15 to 0.00; p=0.05; hospital stay: MD 0.10; 95% CI -0.46 to 0.66; p=0.73; complications: OR 1.21; 95% CI 0.20 to 7.16; p=0.83)                                                                                               | Very low<br>to low<br>certainty<br>evidence |
| Poetscher,<br>2018                 | Plos One                                         | Aug,<br>2017           | MEDLINE, PubMed,<br>EMBASE,<br>CENTRAL, Scopus,<br>LILACS                                                                                                                                | 5                          | Interspinous<br>process device<br>implantation                                                                                                                       | Non-surgical<br>treatment or<br>decompression<br>surgery                                   | Degenerative<br>lumbar spinal<br>stenosis                                                     | IPD implants had significantly higher rates of reoperation (RR 2.05; 95% CI 1.37 to 3.08; p<0.001), with lower cost-effectiveness                                                                                                                                                                                                                                                                                                                                                                                                                           | Very low<br>to<br>moderate<br>certainty     |

| Procedure<br>First author,<br>year | Journal title                           | Last search date | Databases searched                                                                                                                                                                                                       | No. of RCTs included | Intervention                             | Comparator                                         | Condition                           | Key findings                                                                                                                                                                                                                                                                                                                                                                                                        | GRADE results                      |
|------------------------------------|-----------------------------------------|------------------|--------------------------------------------------------------------------------------------------------------------------------------------------------------------------------------------------------------------------|----------------------|------------------------------------------|----------------------------------------------------|-------------------------------------|---------------------------------------------------------------------------------------------------------------------------------------------------------------------------------------------------------------------------------------------------------------------------------------------------------------------------------------------------------------------------------------------------------------------|------------------------------------|
|                                    |                                         |                  |                                                                                                                                                                                                                          |                      |                                          |                                                    |                                     |                                                                                                                                                                                                                                                                                                                                                                                                                     | evidence                           |
| Shen, 2018                         | Pain Physician                          | Aug, 2016        | PubMed, EMBASE, MEDLINE, CENTRAL, Cochrane Library                                                                                                                                                                       | 5                    | Spinal decompression with fusion         | Spinal decompression alone                         | Degenerative lumbar spinal stenosis | Additional fusion surgery seems unlikely to result in better outcomes (satisfaction: SMD -0.11; 95% CI -0.46 to 0.24; p<=0.53; ODI (two years): SMD 1.64; 95% CI -7.07 to 10.36; p=0.71) for patients with degenerative LSS, but it may increase additional risks in terms of operative duration (SMD -130.37; 95% CI -212.54 to -130.37; p=0.002) and blood loss (SMD -461.78; 95% CI -639.15 to -284.42; p<0.001) | Not used                           |
| Xu, 2019                           | Medicine (Baltimore)                    | Dec, 2018        | PubMed, MEDLINE, EMBASE, CENTRAL, Web of Science                                                                                                                                                                         | 9                    | Spinal decompression alone               | Spinal decompression with fusion                   | Degenerative lumbar spinal stenosis | Fusion group has no better clinical results than decompression alone in LSS, regardless of degenerative spondylolisthesis and follow-up (pain: MD -0.03; 95% CI -0.83 to 0.76; p=0.94; satisfaction: OR 0.74; 95% CI 0.32 to 1.69; p=0.48; ODI: MD 6.58; 95% CI -5.66 to 18.82; p=0.29)                                                                                                                             | High certainty evidence            |
| Yang, 2020                         | Medicine (Baltimore)                    | Jul, 2019        | CENTRAL, PubMed, EMBASE                                                                                                                                                                                                  | 21                   | Spinal decompression +/- fusion          | Different methods of decompression, fusion or both | Degenerative lumbar spinal stenosis | No overall optimal therapy for lumbar stenosis (ODI: SMD -0.51; 95% CI -1.05 to 0.03; p=0.44)                                                                                                                                                                                                                                                                                                                       | Not used                           |
| Zaina, 2016                        | Cochrane Database of Systematic Reviews | Feb, 2015        | CENTRAL, MEDLINE, MEDLINE In-Process and Other Non-Indexed Citations, EMBASE, CINAHL, Index to Chiropractic Literature, PEDro, ClinicalTrial.gov, WHO ICTRP, PubMed, Cochrane Back and Neck Review Group Trials Register | 5                    | Surgical treatment                       | Non-surgical treatment                             | Degenerative lumbar spinal stenosis | No clear benefits were observed with surgery versus non-surgical treatment (ODI (one year): MD -6.17; 95% CI -15.02 to 2.67; p=0.17)                                                                                                                                                                                                                                                                                | Low certainty evidence             |
| Zhao, 2017                         | International Journal of Surgery        | Aug, 2016        | PubMed, Cochrane Library, CENTRAL, MEDLINE, China National Knowledge database, Wanfang database                                                                                                                          | 4                    | Interspinous process device implantation | Spinal decompression                               | Degenerative lumbar spinal stenosis | Although patients who received IPD may obtain several benefits in the short term (VAS pain: MD 9.65; 95% CI 0.78 to 18.51; p=0.03), it was associated with higher costs and reoperation rates (RR 2.91; 95% CI 1.72 to 4.92; p<0.001). Both IPD and bony decompression were acceptable strategies for LSS, but the risks, indications, and costs of IPD should be carefully taken into account before surgery       | Not used                           |
| <b>Lumbar spine fusion</b>         |                                         |                  |                                                                                                                                                                                                                          |                      |                                          |                                                    |                                     |                                                                                                                                                                                                                                                                                                                                                                                                                     |                                    |
| Bai, 2019                          | Medicine (Baltimore)                    | Oct, 2018        | PubMed, Web of Science, EMBASE, CENTRAL, Chinese Knowledge Infrastructure database, Wanfang database, VIP database                                                                                                       | 14                   | Total disc replacement                   | Lumbar fusion                                      | Lumbar degenerative disc disease    | TDR is recommended to alleviate the pain (VAS: SMD -0.21; 95% CI -0.33 to -0.09; p=0.001) of degenerative lumbar diseases, improve the state of lumbar function (ODI: SMD -0.28; 95% CI -0.40 to -0.15; p<0.001) and the quality of life (SF-36: SMD 0.28; 95% CI 0.16 to 0.41; p<0.001) of patients, provide a high level of security, have better health economics benefits for one-level patients                | Low to moderate certainty evidence |



| Procedure<br>First author,<br>year | Journal title                                              | Last<br>search<br>date | Databases searched                                                                          | No. of<br>RCTs<br>included | Intervention           | Comparator                                                                                                        | Condition                                | Key findings                                                                                                                                                                                                                                                                                                                                                                                                                                                                              | GRADE<br>results                        |
|------------------------------------|------------------------------------------------------------|------------------------|---------------------------------------------------------------------------------------------|----------------------------|------------------------|-------------------------------------------------------------------------------------------------------------------|------------------------------------------|-------------------------------------------------------------------------------------------------------------------------------------------------------------------------------------------------------------------------------------------------------------------------------------------------------------------------------------------------------------------------------------------------------------------------------------------------------------------------------------------|-----------------------------------------|
| Bydon, 2014                        | Journal of Spinal Disorders and Techniques                 | Aug, 2013              | PubMed and CENTRAL                                                                          | 5                          | Lumbar fusion          | Non-surgical treatment (physical therapy, patient education, exercise, pain relief by acupuncture and injections) | Chronic discogenic lower back pain       | No significant difference when compared with the nonoperative group (ODI: MD -7.39; 95% CI -20.26 to 5.47; p=0.26)                                                                                                                                                                                                                                                                                                                                                                        | Not used                                |
| Hiratzka, 2015                     | Global Spine Journal                                       | May, 2015              | PubMed, CENTRAL, National Guideline Clearinghouse database                                  | 7                          | Lumbar fusion          | Total disc replacement                                                                                            | Lumbar degenerative disc disease         | Lumbar TDR appears to be comparable in safety to lumbar fusion over five years (adverse events: RR 1.86; 95% CI 0.68 to 5.10; p=0.23; reoperation: RR 1.10; 95% CI 0.56 to 2.15; p=0.78)                                                                                                                                                                                                                                                                                                  | Not used                                |
| Jacobs, 2012                       | Cochrane Database of Systematic Reviews                    | Dec, 2011              | CENTRAL, CBRG trials register, MEDLINE, EMBASE, BIOSIS, FDA register and ClinicalTrials.gov | 6                          | Total disc replacement | Lumbar spine fusion                                                                                               | Lumbar degenerative disc disease         | Although statistically significant, the differences between disc replacement and conventional fusion surgery for degenerative disc disease were not beyond the generally accepted clinical important differences for short-term pain relief (VAS: MD 5.22; 95% CI 0.18 to 10.26; p=0.04), disability (ODI: OR 1.45; 95% CI 1.08 to 1.98; p=0.02) and QOL. Moreover, these analyses only represent a highly selected population                                                            | Very low to moderate certainty evidence |
| Li, 2018                           | Journal of Orthopaedic Surgery and Research                | Feb, 2018              | EMBASE, PubMed, Web of Science and Google                                                   | 7                          | Open TLIF fusion       | Minimally invasive TLIF fusion                                                                                    | Single-level degenerative lumbar disease | MI-TLIF showed significantly less blood loss (SMD -291.46; 95% CI -366.66 to -216.47; p<0.001) compared with O-TLIF and more fluoroscopic time (SMD 35.79; 95% CI 23.31 to 48.27; p<0.001). There was no significant difference between the length of hospital stay (SMD -1.63; 95% CI -3.76 to 0.49; p=0.13), postoperative VAS (SMD -0.19; 95% CI -0.63 to 0.25; p=0.39) or ODI (SMD 0.20; 95% CI -1.18 to 1.58; p=0.78)                                                                | Not used                                |
| Li, 2020                           | Turkish Neurosurgery                                       | Jun, 2017              | PubMed, EMBASE, CENTRAL                                                                     | 7                          | Total disc replacement | Lumbar fusion                                                                                                     | Lumbar degenerative disc disease         | TDR could be an alternative treatment for LDDD, since it yielded better clinical success (RR 1.10; 95% CI 1.03 to 1.17; p=0.003) and patient satisfaction (RR 1.18; 95% CI 1.10 to 1.27; p<0.001), shorter hospital stays (SMD -0.95; 95% CI -1.55 to -0.35; p=0.002) and operative time (SMD -1.16; 95% CI -1.98 to -0.35; p=0.005), less pain (VAS: SMD -0.18; 95% CI -0.29 to -0.08; p=0.001), and lower complication rates (RR 0.59; 95% CI 0.47 to 0.75; p<0.001) than lumbar fusion | Not used                                |
| Miller, 2020                       | World Neurosurgery                                         | Feb, 2019              | MEDLINE, EMBASE, CENTRAL, DOAJ and Google Scholar                                           | 7                          | Open TLIF fusion       | Minimally invasive TLIF fusion                                                                                    | Lumbar degenerative disc disease         | MI-TLIF is associated with less blood loss (MD -200; 95% CI -307 to -93; p<0.001), shorter hospital stays (MD -2.2; 95% CI -2.7 to -1.7; p<0.001), and slightly less disability (ODI: MD -3; 95% CI -5 to -12; p=0.01), at the expense of longer fluoroscopy time (MD 48; 95% CI 44 to 53; p<0.001)                                                                                                                                                                                       | Not used                                |
| Nie, 2015                          | Journal of the College of Physicians and Surgeons Pakistan | Sep, 2011              | PubMed, EMBASE and CENTRAL                                                                  | 6                          | Total disc replacement | Lumbar fusion                                                                                                     | Lumbar degenerative disc disease         | Over a long-term of follow-up (two years) TDR shows a significant superiority for the treatment of LDDD compared with fusion (ODI: MD -4.87; 95% CI -7.77 to -1.97; p=0.001; VAS (pain): MD -5.13; 95% CI -9.02 to -1.25; p=0.01; satisfaction: OR 1.68; 95% CI 1.26 to 2.25; p<0.001; complications: OR 0.65; 95% CI 0.29 to 0.84; p=0.08)                                                                                                                                               | Not used                                |
| Rao, 2014                          | Archives of Orthopaedic and Trauma Surgery                 | Mar, 2013              | MEDLINE, EMBASE, Clinical, Ovid, BIOSIS, CENTRAL, Spine, European Spine Journal, Journal of | 7                          | Total disc replacement | Lumbar fusion                                                                                                     | Lumbar degenerative disc disease         | TDR showed significant safety and efficacy (ODI: MD -5.09; 95% CI -7.33 to -2.64; p<0.001) comparable to lumbar fusion at two-year follow-up. TDR demonstrated superiorities in improved physical function, reduced pain (VAS: MD -5.31; 95% CI -8.35 to 2.28; p<0.001) and shorten duration of hospitalisation (MD -0.82; 95% CI -1.38 to -0.26; p=0.004)                                                                                                                                | Not used                                |

| Procedure<br>First author,<br>year | Journal title                                               | Last<br>search<br>date | Databases searched                                                                                                           | No. of<br>RCTs<br>included | Intervention                                      | Comparator                                                                       | Condition                                      | Key findings                                                                                                                                                                                                                                                                                                                                                                                                                                                                                                                                                                                                                                                                                                                                                                                                                                                                                                                                                                                                                                                                                                                                                                                                                                                                                                                                                                                                                                                                                                                                                                                                                                                                                                                                                                                                             | GRADE<br>results |
|------------------------------------|-------------------------------------------------------------|------------------------|------------------------------------------------------------------------------------------------------------------------------|----------------------------|---------------------------------------------------|----------------------------------------------------------------------------------|------------------------------------------------|--------------------------------------------------------------------------------------------------------------------------------------------------------------------------------------------------------------------------------------------------------------------------------------------------------------------------------------------------------------------------------------------------------------------------------------------------------------------------------------------------------------------------------------------------------------------------------------------------------------------------------------------------------------------------------------------------------------------------------------------------------------------------------------------------------------------------------------------------------------------------------------------------------------------------------------------------------------------------------------------------------------------------------------------------------------------------------------------------------------------------------------------------------------------------------------------------------------------------------------------------------------------------------------------------------------------------------------------------------------------------------------------------------------------------------------------------------------------------------------------------------------------------------------------------------------------------------------------------------------------------------------------------------------------------------------------------------------------------------------------------------------------------------------------------------------------------|------------------|
|                                    |                                                             |                        | Bone and Joint<br>Surgery (US) and<br>Journal of Bone and<br>Joint Surgery (UK)                                              |                            |                                                   |                                                                                  |                                                |                                                                                                                                                                                                                                                                                                                                                                                                                                                                                                                                                                                                                                                                                                                                                                                                                                                                                                                                                                                                                                                                                                                                                                                                                                                                                                                                                                                                                                                                                                                                                                                                                                                                                                                                                                                                                          |                  |
| Wang, 2015                         | Journal of<br>Back and<br>Musculoskeletal<br>Rehabilitation | Mar,<br>2013           | PubMed, CENTRAL,<br>EMBASE, Science<br>Citation Index and<br>Chinese Biomedical<br>Literature database                       | 6                          | Lumbar fusion                                     | Non-surgical<br>treatment<br>(physical<br>exercises and<br>cognitive<br>therapy) | Chronic<br>discogenic lower<br>back pain       | Fusion surgery was not superior to nonsurgical treatment in terms of changes in ODI (MD 1.94; 95% CI -6.02 to 2.14) scores for DLBP. Fusion surgery resulted in surgical complications (RR 22.11; 95% CI 55.99 to 81.60)                                                                                                                                                                                                                                                                                                                                                                                                                                                                                                                                                                                                                                                                                                                                                                                                                                                                                                                                                                                                                                                                                                                                                                                                                                                                                                                                                                                                                                                                                                                                                                                                 | Not used         |
| Wei, 2013                          | International<br>Orthopaedics                               | Jan,<br>2013           | PubMedCentral,<br>MEDLINE,<br>EMBASE, BIOSIS,<br>ClinicalTrials.gov and<br>FDA trials register                               | 6                          | Total disc<br>replacement                         | Lumbar fusion                                                                    | Lumbar<br>degenerative disc<br>disease         | TDR has significant safety and efficacy comparable to lumbar fusion at a two-year follow-up. Although superiority compared to fusion could not be proved, by comparing clinical symptoms relieved (VAS (pain): MD -3.18; 95% CI -5.74 to -0.63; p=0.01; ODI: MD -5.13; 95% CI -7.35 to -2.90; p<0.001), motion preserved, and the low reoperation rate (OR 0.91; 95% CI 0.57 to 1.46; p=0.71) during long-term follow-up on TDR, TDR was considered safe and effective<br>TDR results in a slightly better functioning (ODI: MD -3.92; 95% CI -7.92 to 0.08; p=0.05) and pain (VAS: MD -4.19; 95% CI -9.72 to 1.33) status without clinical significance, and a significantly greater patient satisfaction (SMD 0.29; 95% CI 0.05 to 0.53; p=0.02) at the two-year follow-up point. Omitting the study that used stand-alone cage interbody fusion as the control, there is no longer a significant difference in function and pain status and patient satisfaction between TDR and the fusion group. At five years, these outcomes are not significantly different between comparing groups. Complication (OR 0.64; 95% CI 0.32 to 1.32; p=0.23) and reoperation rate (OR 0.88; 95% CI 0.38 to 2.00; p=0.75) are similar between the two groups at two and five years respectively. From the existing outcomes, the TDR does not show significant superiority for the treatment of lumbar DDD compared with fusion<br>TDR is an effective treatment compared with spinal fusion in lumbar DDD. It offers several clinical advantages that can benefit the patient, without the addition of safety consequences (ODI: RR 1.09; 95% CI 1.00 to 1.19; p=0.05; VAS (pain): MD -2.79; 95% CI -8.09 to 2.51; p=0.30; satisfaction: RR 1.13; 95% CI 1.03 to 1.24; p=0.009; reoperation: RR 0.52; 95% CI 0.35 to 0.77; p=0.001) | Not used         |
| Yajun, 2010                        | European<br>Spine Journal                                   | Jul,<br>2009           | PubMed, CENTRAL,<br>Ovid, MEDLINE,<br>EMBASE, Spine,<br>European Spine Journal<br>and, Journal of Bone<br>and Joint Surgery  | 5                          | Total disc<br>replacement                         | Lumbar fusion                                                                    | Lumbar<br>degenerative disc<br>disease         | TDR results in a slightly better functioning (ODI: MD -3.92; 95% CI -7.92 to 0.08; p=0.05) and pain (VAS: MD -4.19; 95% CI -9.72 to 1.33) status without clinical significance, and a significantly greater patient satisfaction (SMD 0.29; 95% CI 0.05 to 0.53; p=0.02) at the two-year follow-up point. Omitting the study that used stand-alone cage interbody fusion as the control, there is no longer a significant difference in function and pain status and patient satisfaction between TDR and the fusion group. At five years, these outcomes are not significantly different between comparing groups. Complication (OR 0.64; 95% CI 0.32 to 1.32; p=0.23) and reoperation rate (OR 0.88; 95% CI 0.38 to 2.00; p=0.75) are similar between the two groups at two and five years respectively. From the existing outcomes, the TDR does not show significant superiority for the treatment of lumbar DDD compared with fusion<br>TDR is an effective treatment compared with spinal fusion in lumbar DDD. It offers several clinical advantages that can benefit the patient, without the addition of safety consequences (ODI: RR 1.09; 95% CI 1.00 to 1.19; p=0.05; VAS (pain): MD -2.79; 95% CI -8.09 to 2.51; p=0.30; satisfaction: RR 1.13; 95% CI 1.03 to 1.24; p=0.009; reoperation: RR 0.52; 95% CI 0.35 to 0.77; p=0.001)                                                                                                                                                                                                                                                                                                                                                                                                                                                                           | Not used         |
| Zigler, 2018                       | Global Spine<br>Journal                                     | 2015                   | PubMed, MEDLINE<br>and CENTRAL                                                                                               | 4                          | Total disc<br>replacement                         | Lumbar fusion                                                                    | Single-level<br>degenerative<br>lumbar disease | TDR is an effective treatment compared with spinal fusion in lumbar DDD. It offers several clinical advantages that can benefit the patient, without the addition of safety consequences (ODI: RR 1.09; 95% CI 1.00 to 1.19; p=0.05; VAS (pain): MD -2.79; 95% CI -8.09 to 2.51; p=0.30; satisfaction: RR 1.13; 95% CI 1.03 to 1.24; p=0.009; reoperation: RR 0.52; 95% CI 0.35 to 0.77; p=0.001)                                                                                                                                                                                                                                                                                                                                                                                                                                                                                                                                                                                                                                                                                                                                                                                                                                                                                                                                                                                                                                                                                                                                                                                                                                                                                                                                                                                                                        | Not used         |
| <b>Total hip replacement</b>       |                                                             |                        |                                                                                                                              |                            |                                                   |                                                                                  |                                                |                                                                                                                                                                                                                                                                                                                                                                                                                                                                                                                                                                                                                                                                                                                                                                                                                                                                                                                                                                                                                                                                                                                                                                                                                                                                                                                                                                                                                                                                                                                                                                                                                                                                                                                                                                                                                          |                  |
| Jiang, 2011                        | The Journal of<br>Arthroplasty                              | Jun,<br>2009           | Cochrane Bone Joint<br>and Muscle Trauma<br>Group Specialised<br>Register, CENTRAL,<br>PubMed, Ovid,<br>ScienceDirect Online | 4                          | Metal-on-metal<br>hip resurfacing<br>arthroplasty | Standard total<br>hip arthroplasty                                               | Hip disease in<br>young active<br>patients     | Insufficient evidence to determine whether modern MMHRA offers clinical advantages over standard THR for the treatment of hip disease in active young patients (revision risk: RR 2.60; 95% CI 1.31 to 5.15; p=0.006; dislocation risk: RR 0.25; 95% CI 0.05 to 1.21; p=0.08; three-year mortality: RR 1.05; 95% CI 0.24 to 4.66; p=0.07; loosening risk: RR 4.96; 95% CI 1.82 to 13.50; p=0.002; PJI risk: RR 2.25; 95% CI 0.61 to 8.31; p=0.22; HHS: MD 0.50; 95% CI -0.41 to 1.41; p=0.28)                                                                                                                                                                                                                                                                                                                                                                                                                                                                                                                                                                                                                                                                                                                                                                                                                                                                                                                                                                                                                                                                                                                                                                                                                                                                                                                            | Not used         |

| Procedure<br>First author,<br>year | Journal title                         | Last<br>search<br>date | Databases searched                                                                                                                                                                                      | No. of<br>RCTs<br>included | Intervention                                 | Comparator                                                                                                                             | Condition                      | Key findings                                                                                                                                                                                                                                                                                                                                                                                                     | GRADE<br>results |
|------------------------------------|---------------------------------------|------------------------|---------------------------------------------------------------------------------------------------------------------------------------------------------------------------------------------------------|----------------------------|----------------------------------------------|----------------------------------------------------------------------------------------------------------------------------------------|--------------------------------|------------------------------------------------------------------------------------------------------------------------------------------------------------------------------------------------------------------------------------------------------------------------------------------------------------------------------------------------------------------------------------------------------------------|------------------|
| Smith, 2010                        | Acta<br>Orthopaedica                  | Jan,<br>2010           | MEDLINE, CINAHL,<br>AMED, EMBASE,<br>SIGLE, National<br>Technical Information<br>Service, National<br>Research Register UK,<br>British Library<br>Integrated Catalogue,<br>Current Controlled<br>Trials | 10                         | Conventional<br>THR                          | Hip resurfacing                                                                                                                        | Hip pathology                  | Resurfacing may have better functional outcomes (WOMAC: MD -2.41; 95% CI -3.88 to -0.94; p=0.001) than THR, but the increased risks of heterotopic ossification (RR 1.62; 95% CI 1.23 to 2.14; p<0.001), aseptic loosening (RR 3.07; 95% CI 1.11 to 8.50; p=0.03), and revision surgery (RR 1.72; 95% CI 1.20 to 2.45; p=0.003) following resurfacing indicate that THA is superior in terms of implant survival | Not used         |
| Springer, 2009                     | The Journal of<br>Arthroplasty        | Mar,<br>2008           | MEDLINE, PubMed,<br>CINAHL                                                                                                                                                                              | 0                          | THR                                          | Hip resurfacing                                                                                                                        | Hip pathology                  | The pooled failure rate for THR was 1.3% (95% CI 1.0 to 1.7), compared to 2.6% (95% CI 2.0 to 3.4) for hip resurfacing, therefore the enthusiasm for hip resurfacing should be tempered by these data                                                                                                                                                                                                            | Not used         |
| <b>Total knee replacement</b>      |                                       |                        |                                                                                                                                                                                                         |                            |                                              |                                                                                                                                        |                                |                                                                                                                                                                                                                                                                                                                                                                                                                  |                  |
| Skou, 2015                         | New England<br>Journal of<br>Medicine | NA                     | NA                                                                                                                                                                                                      | 1                          | TKR followed<br>by non-surgical<br>treatment | Non-surgical<br>treatment<br>(consisted of<br>exercise,<br>education,<br>dietary advice,<br>use of insoles,<br>and pain<br>medication) | Moderate-to-<br>severe knee OA | Treatment with TKR followed by nonsurgical treatment resulted in greater pain relief (MD 17.1; 95% CI 10.4 to 23.8) and functional improvement (KOOS: MD 15.8; 95% CI 10.0 to 21.5) after 12 months than did nonsurgical treatment alone. However, TKR was associated with a higher number of serious adverse events than was nonsurgical treatment (24 vs 6 months; p=0.005)                                    | NA               |

#### Key (alphabetical)

ACL=anterior cruciate ligament; ADL=activities of daily living; AMED=Allied and Complementary Medicine Database; ANZCTR=Australian New Zealand Clinical Trials Registry; APM=arthroscopic partial meniscectomy; CENTRAL=Cochrane Central Register of Controlled Trials; CI=confidence interval; CINAHL=Cumulative Index to Nursing and Allied Health Literature; CTS=carpal tunnel syndrome; DLBP=discogenic lower back pain; ECTR=endoscopic carpal tunnel release; EMBASE=Excerpta Medica Database; EQ-5D=EuroQol health-related quality of life measure; IKDC=International Knee Documentation Committee subjective knee form; HHS=Harris Hip Score; IPD=interspinous process device; ISRCTN=International Standard Randomised, Controlled Trial Number; KOOS=Knee injury and Osteoarthritis Outcome Score; LDDD= lumbar degenerative disc disease; LILACS=Latin American and Caribbean Health Sciences Literature; LKSS=Lysholm Knee Scoring Scale; LSS=lumbar spine stenosis; MD=mean difference; MEDLINE=Medical Literature Analysis and Retrieval System Online; MI-TLIF=minimally invasive transforaminal interbody fusion; MMHRA=metal-on-metal hip resurfacing arthroplasty; NA=Not applicable; NIC=neurogenic intermittent claudication; NHS CRD=National Health Service Centre for Reviews and Dissemination; PJI=periprosthetic joint infection; OA=osteoarthritis; ODI=Oswestry Disability Index; OR=odds ratio; O-TLIF=open transforaminal interbody fusion; PEDro=Physiotherapy Evidence Database; PROM=patient reported outcome measure; QOL=quality of life; RR=relative risk (or risk ratio); SF-36=36-item Short Form survey; SIGLE=System for Information on Grey Literature in Europe; SMD=standardised mean difference; TDR=total disc replacement; THR=total hip replacement; TKR=total knee replacement; TLIF= transforaminal interbody fusion; WHO ICRTP=World Health Organisation International Clinical Trials Registry Platform; WOMAC=Western Ontario and McMaster universities osteoarthritis index; VAS=Visual Analogue Scale.

**Appendix 7.** AMSTAR scores for the included studies

| <b>Procedure</b><br>First author, year                        | <b>Was an <i>a priori</i> design provided?</b> | <b>Was there duplicate study selection and data extraction?</b> | <b>Was a comprehensive literature search performed?</b> | <b>Was the status of publication (i.e. grey literature) used as an inclusion criterion?</b> | <b>Was a list of studies (included and excluded) provided?</b> | <b>Were the characteristics of the included studies provided?</b> | <b>Was the scientific quality of the included studies assessed and documented?</b> | <b>Was the scientific quality of the included studies used appropriately in formulating conclusions?</b> | <b>Were the methods used to combine the findings of studies appropriate?</b> | <b>Was the likelihood of publication bias assessed?</b> | <b>Was the conflict of interest stated?</b> | <b>Total score (max. 11)</b> |
|---------------------------------------------------------------|------------------------------------------------|-----------------------------------------------------------------|---------------------------------------------------------|---------------------------------------------------------------------------------------------|----------------------------------------------------------------|-------------------------------------------------------------------|------------------------------------------------------------------------------------|----------------------------------------------------------------------------------------------------------|------------------------------------------------------------------------------|---------------------------------------------------------|---------------------------------------------|------------------------------|
| <b>Arthroscopic anterior cruciate ligament reconstruction</b> |                                                |                                                                 |                                                         |                                                                                             |                                                                |                                                                   |                                                                                    |                                                                                                          |                                                                              |                                                         |                                             |                              |
| Lien-Iversen, 2020                                            | 1                                              | 1                                                               | 1                                                       | 1                                                                                           | 0                                                              | 1                                                                 | 1                                                                                  | 1                                                                                                        | 1                                                                            | 0                                                       | 1                                           | 9                            |
| Monk, 2016                                                    | 1                                              | 1                                                               | 1                                                       | 1                                                                                           | 1                                                              | 1                                                                 | 1                                                                                  | 1                                                                                                        | 1                                                                            | 1                                                       | 1                                           | 11                           |
| Smith, 2014                                                   | 0                                              | 1                                                               | 1                                                       | 1                                                                                           | 1                                                              | 1                                                                 | 1                                                                                  | 1                                                                                                        | 1                                                                            | 0                                                       | 1                                           | 9                            |
| <b>Arthroscopic meniscal repair</b>                           |                                                |                                                                 |                                                         |                                                                                             |                                                                |                                                                   |                                                                                    |                                                                                                          |                                                                              |                                                         |                                             |                              |
| Xu, 2015                                                      | 0                                              | 1                                                               | 1                                                       | 1                                                                                           | 0                                                              | 1                                                                 | 0                                                                                  | 0                                                                                                        | 1                                                                            | 0                                                       | 0                                           | 5                            |
| <b>Arthroscopic partial meniscectomy</b>                      |                                                |                                                                 |                                                         |                                                                                             |                                                                |                                                                   |                                                                                    |                                                                                                          |                                                                              |                                                         |                                             |                              |
| Abram, 2020                                                   | 1                                              | 1                                                               | 1                                                       | 1                                                                                           | 1                                                              | 1                                                                 | 1                                                                                  | 1                                                                                                        | 1                                                                            | 1                                                       | 1                                           | 11                           |
| Brignardello-Petersen, 2017                                   | 1                                              | 1                                                               | 1                                                       | 1                                                                                           | 1                                                              | 1                                                                 | 1                                                                                  | 1                                                                                                        | 1                                                                            | 1                                                       | 1                                           | 11                           |
| Khan, 2014                                                    | 0                                              | 1                                                               | 1                                                       | 1                                                                                           | 0                                                              | 1                                                                 | 1                                                                                  | 1                                                                                                        | 1                                                                            | 1                                                       | 1                                           | 9                            |
| Lee, 2018                                                     | 0                                              | 1                                                               | 1                                                       | 1                                                                                           | 0                                                              | 1                                                                 | 1                                                                                  | 1                                                                                                        | 1                                                                            | 0                                                       | 1                                           | 8                            |
| Thorlund, 2015                                                | 1                                              | 1                                                               | 1                                                       | 1                                                                                           | 1                                                              | 1                                                                 | 1                                                                                  | 1                                                                                                        | 1                                                                            | 0                                                       | 1                                           | 10                           |
| van de Graaf, 2016                                            | 1                                              | 1                                                               | 1                                                       | 1                                                                                           | 0                                                              | 1                                                                 | 1                                                                                  | 1                                                                                                        | 1                                                                            | 1                                                       | 1                                           | 10                           |
| <b>Arthroscopic rotator cuff repair</b>                       |                                                |                                                                 |                                                         |                                                                                             |                                                                |                                                                   |                                                                                    |                                                                                                          |                                                                              |                                                         |                                             |                              |
| Ji, 2015                                                      | 0                                              | 1                                                               | 1                                                       | 1                                                                                           | 0                                                              | 1                                                                 | 1                                                                                  | 1                                                                                                        | 1                                                                            | 0                                                       | 1                                           | 8                            |
| Karjalainen, 2019                                             | 1                                              | 1                                                               | 1                                                       | 1                                                                                           | 1                                                              | 1                                                                 | 1                                                                                  | 1                                                                                                        | 1                                                                            | 1                                                       | 1                                           | 11                           |
| Schemitsch, 2019                                              | 0                                              | 1                                                               | 1                                                       | 1                                                                                           | 0                                                              | 1                                                                 | 1                                                                                  | 1                                                                                                        | 1                                                                            | 0                                                       | 0                                           | 7                            |
| <b>Arthroscopic subacromial decompression</b>                 |                                                |                                                                 |                                                         |                                                                                             |                                                                |                                                                   |                                                                                    |                                                                                                          |                                                                              |                                                         |                                             |                              |
| Karjalainen, 2019                                             | 1                                              | 1                                                               | 1                                                       | 1                                                                                           | 1                                                              | 1                                                                 | 1                                                                                  | 1                                                                                                        | 1                                                                            | 1                                                       | 1                                           | 11                           |
| Lahdeoja, 2020                                                | 1                                              | 1                                                               | 1                                                       | 1                                                                                           | 0                                                              | 1                                                                 | 1                                                                                  | 1                                                                                                        | 1                                                                            | 1                                                       | 1                                           | 10                           |
| Nazari, 2019                                                  | 1                                              | 1                                                               | 1                                                       | 1                                                                                           | 0                                                              | 1                                                                 | 1                                                                                  | 1                                                                                                        | 1                                                                            | 0                                                       | 1                                           | 9                            |
| <b>Carpal tunnel decompression</b>                            |                                                |                                                                 |                                                         |                                                                                             |                                                                |                                                                   |                                                                                    |                                                                                                          |                                                                              |                                                         |                                             |                              |
| Chen, 2014                                                    | 0                                              | 1                                                               | 1                                                       | 1                                                                                           | 0                                                              | 1                                                                 | 1                                                                                  | 1                                                                                                        | 1                                                                            | 1                                                       | 0                                           | 8                            |
| Hu, 2016                                                      | 0                                              | 1                                                               | 1                                                       | 1                                                                                           | 0                                                              | 1                                                                 | 0                                                                                  | 0                                                                                                        | 1                                                                            | 1                                                       | 1                                           | 7                            |
| Li, 2019                                                      | 0                                              | 1                                                               | 1                                                       | 1                                                                                           | 0                                                              | 1                                                                 | 1                                                                                  | 1                                                                                                        | 1                                                                            | 1                                                       | 1                                           | 9                            |
| Sanati, 2011                                                  | 0                                              | 1                                                               | 1                                                       | 1                                                                                           | 0                                                              | 1                                                                 | 1                                                                                  | 1                                                                                                        | 1                                                                            | 0                                                       | 1                                           | 8                            |
| Sayegh, 2014                                                  | 0                                              | 1                                                               | 1                                                       | 1                                                                                           | 0                                                              | 1                                                                 | 1                                                                                  | 1                                                                                                        | 1                                                                            | 1                                                       | 1                                           | 9                            |
| Thoma, 2004                                                   | 0                                              | 1                                                               | 1                                                       | 1                                                                                           | 0                                                              | 0                                                                 | 1                                                                                  | 1                                                                                                        | 1                                                                            | 1                                                       | 0                                           | 7                            |
| Vasiliadis, 2014                                              | 1                                              | 1                                                               | 1                                                       | 1                                                                                           | 1                                                              | 1                                                                 | 1                                                                                  | 1                                                                                                        | 1                                                                            | 1                                                       | 1                                           | 11                           |
| Verdugo, 2008                                                 | 1                                              | 1                                                               | 1                                                       | 1                                                                                           | 1                                                              | 1                                                                 | 1                                                                                  | 1                                                                                                        | 1                                                                            | 0                                                       | 1                                           | 10                           |
| Zuo, 2015                                                     | 0                                              | 1                                                               | 1                                                       | 1                                                                                           | 1                                                              | 1                                                                 | 1                                                                                  | 1                                                                                                        | 1                                                                            | 0                                                       | 1                                           | 9                            |

| Procedure<br>First author, year   | Was an <i>a priori</i> design provided? | Was there duplicate study selection and data extraction? | Was a comprehensive literature search performed? | Was the status of publication (i.e. grey literature) used as an inclusion criterion? | Was a list of studies (included and excluded) provided? | Were the characteristics of the included studies provided? | Was the scientific quality of the included studies assessed and documented? | Was the scientific quality of the included studies used appropriately in formulating conclusions? | Were the methods used to combine the findings of studies appropriate? | Was the likelihood of publication bias assessed? | Was the conflict of interest stated? | Total score (max. 11) |
|-----------------------------------|-----------------------------------------|----------------------------------------------------------|--------------------------------------------------|--------------------------------------------------------------------------------------|---------------------------------------------------------|------------------------------------------------------------|-----------------------------------------------------------------------------|---------------------------------------------------------------------------------------------------|-----------------------------------------------------------------------|--------------------------------------------------|--------------------------------------|-----------------------|
| <b>Lumbar spine decompression</b> |                                         |                                                          |                                                  |                                                                                      |                                                         |                                                            |                                                                             |                                                                                                   |                                                                       |                                                  |                                      |                       |
| Kovacs, 2011                      | 0                                       | 1                                                        | 1                                                | 1                                                                                    | 1                                                       | 1                                                          | 1                                                                           | 1                                                                                                 | 1                                                                     | 0                                                | 0                                    | 8                     |
| Li, 2017                          | 0                                       | 1                                                        | 1                                                | 1                                                                                    | 1                                                       | 1                                                          | 1                                                                           | 1                                                                                                 | 1                                                                     | 0                                                | 1                                    | 9                     |
| Ma, 2017                          | 0                                       | 1                                                        | 1                                                | 1                                                                                    | 1                                                       | 1                                                          | 1                                                                           | 1                                                                                                 | 1                                                                     | 0                                                | 1                                    | 9                     |
| Machado, 2016                     | 1                                       | 1                                                        | 1                                                | 1                                                                                    | 1                                                       | 1                                                          | 1                                                                           | 1                                                                                                 | 1                                                                     | 1                                                | 1                                    | 11                    |
| Mo, 2018                          | 0                                       | 1                                                        | 1                                                | 1                                                                                    | 0                                                       | 1                                                          | 1                                                                           | 1                                                                                                 | 1                                                                     | 0                                                | 0                                    | 7                     |
| Overdevest, 2015                  | 1                                       | 1                                                        | 1                                                | 1                                                                                    | 1                                                       | 1                                                          | 1                                                                           | 1                                                                                                 | 1                                                                     | 1                                                | 1                                    | 11                    |
| Poetscher, 2018                   | 0                                       | 1                                                        | 1                                                | 1                                                                                    | 1                                                       | 1                                                          | 1                                                                           | 1                                                                                                 | 1                                                                     | 0                                                | 1                                    | 9                     |
| Shen, 2018                        | 0                                       | 1                                                        | 1                                                | 1                                                                                    | 0                                                       | 1                                                          | 1                                                                           | 1                                                                                                 | 1                                                                     | 0                                                | 1                                    | 8                     |
| Xu, 2019                          | 1                                       | 1                                                        | 1                                                | 1                                                                                    | 0                                                       | 1                                                          | 1                                                                           | 1                                                                                                 | 1                                                                     | 1                                                | 1                                    | 10                    |
| Yang, 2020                        | 0                                       | 1                                                        | 1                                                | 1                                                                                    | 0                                                       | 1                                                          | 0                                                                           | 0                                                                                                 | 1                                                                     | 0                                                | 1                                    | 6                     |
| Zaina, 2016                       | 1                                       | 1                                                        | 1                                                | 1                                                                                    | 1                                                       | 1                                                          | 1                                                                           | 1                                                                                                 | 1                                                                     | 1                                                | 1                                    | 11                    |
| Zhao, 2017                        | 0                                       | 1                                                        | 1                                                | 1                                                                                    | 0                                                       | 1                                                          | 1                                                                           | 1                                                                                                 | 1                                                                     | 0                                                | 0                                    | 7                     |
| <b>Lumbar spine fusion</b>        |                                         |                                                          |                                                  |                                                                                      |                                                         |                                                            |                                                                             |                                                                                                   |                                                                       |                                                  |                                      |                       |
| Bai, 2019                         | 1                                       | 1                                                        | 1                                                | 1                                                                                    | 0                                                       | 1                                                          | 1                                                                           | 1                                                                                                 | 1                                                                     | 1                                                | 1                                    | 10                    |
| Bydon, 2014                       | 0                                       | 1                                                        | 1                                                | 1                                                                                    | 0                                                       | 1                                                          | 1                                                                           | 1                                                                                                 | 1                                                                     | 0                                                | 1                                    | 8                     |
| Hiratzka, 2015                    | 0                                       | 0                                                        | 1                                                | 1                                                                                    | 1                                                       | 1                                                          | 0                                                                           | 0                                                                                                 | 1                                                                     | 0                                                | 1                                    | 6                     |
| Jacobs, 2012                      | 1                                       | 1                                                        | 1                                                | 1                                                                                    | 1                                                       | 1                                                          | 1                                                                           | 1                                                                                                 | 1                                                                     | 1                                                | 1                                    | 11                    |
| Li, 2018                          | 0                                       | 1                                                        | 1                                                | 1                                                                                    | 0                                                       | 1                                                          | 1                                                                           | 1                                                                                                 | 1                                                                     | 1                                                | 1                                    | 9                     |
| Li, 2020                          | 0                                       | 1                                                        | 1                                                | 1                                                                                    | 0                                                       | 1                                                          | 1                                                                           | 1                                                                                                 | 1                                                                     | 1                                                | 0                                    | 8                     |
| Miller, 2020                      | 1                                       | 1                                                        | 1                                                | 1                                                                                    | 0                                                       | 1                                                          | 1                                                                           | 1                                                                                                 | 1                                                                     | 1                                                | 1                                    | 10                    |
| Nie, 2015                         | 0                                       | 1                                                        | 1                                                | 1                                                                                    | 0                                                       | 1                                                          | 1                                                                           | 1                                                                                                 | 1                                                                     | 1                                                | 0                                    | 8                     |
| Rao, 2014                         | 0                                       | 1                                                        | 1                                                | 1                                                                                    | 0                                                       | 1                                                          | 1                                                                           | 1                                                                                                 | 1                                                                     | 1                                                | 1                                    | 9                     |
| Wang, 2015                        | 0                                       | 1                                                        | 1                                                | 1                                                                                    | 0                                                       | 1                                                          | 1                                                                           | 1                                                                                                 | 1                                                                     | 0                                                | 0                                    | 7                     |
| Wei, 2013                         | 0                                       | 1                                                        | 1                                                | 1                                                                                    | 0                                                       | 1                                                          | 1                                                                           | 1                                                                                                 | 1                                                                     | 0                                                | 0                                    | 7                     |
| Yajun, 2010                       | 0                                       | 1                                                        | 1                                                | 1                                                                                    | 0                                                       | 1                                                          | 1                                                                           | 1                                                                                                 | 1                                                                     | 1                                                | 1                                    | 9                     |
| Zigler, 2018                      | 0                                       | 1                                                        | 1                                                | 1                                                                                    | 0                                                       | 1                                                          | 1                                                                           | 1                                                                                                 | 1                                                                     | 0                                                | 1                                    | 8                     |
| <b>Total hip replacement</b>      |                                         |                                                          |                                                  |                                                                                      |                                                         |                                                            |                                                                             |                                                                                                   |                                                                       |                                                  |                                      |                       |
| Jiang, 2011                       | 0                                       | 1                                                        | 1                                                | 1                                                                                    | 0                                                       | 0                                                          | 0                                                                           | 0                                                                                                 | 1                                                                     | 0                                                | 0                                    | 4                     |
| Smith, 2010                       | 0                                       | 1                                                        | 1                                                | 1                                                                                    | 0                                                       | 1                                                          | 0                                                                           | 0                                                                                                 | 1                                                                     | 1                                                | 1                                    | 7                     |
| Springer, 2009                    | 0                                       | 1                                                        | 1                                                | 1                                                                                    | 0                                                       | 1                                                          | 0                                                                           | 0                                                                                                 | 1                                                                     | 0                                                | 1                                    | 6                     |

## Appendix 8. Findings of randomised controlled trials at low risk of bias

| First author                                                  | Population                                                                                                                    | Intervention                                                                                    | Comparators                                                      | Findings                                                                                                                                                                                                                                                                                                                                                                                                                                                                                                                      |
|---------------------------------------------------------------|-------------------------------------------------------------------------------------------------------------------------------|-------------------------------------------------------------------------------------------------|------------------------------------------------------------------|-------------------------------------------------------------------------------------------------------------------------------------------------------------------------------------------------------------------------------------------------------------------------------------------------------------------------------------------------------------------------------------------------------------------------------------------------------------------------------------------------------------------------------|
| <b>Arthroscopic anterior cruciate ligament reconstruction</b> |                                                                                                                               |                                                                                                 |                                                                  |                                                                                                                                                                                                                                                                                                                                                                                                                                                                                                                               |
| Frobell, 2010 and 2013                                        | 121 adults with acute ACL injuries                                                                                            | Structured rehabilitation plus early ACL reconstruction                                         | Structured rehabilitation plus optional later ACL reconstruction | <p><b>Two-year outcomes:</b> No difference in KOOS-4 score (MD 0.2, 95% CI -6.5 to 6.8); No difference in knee-related outcomes, health status, and return to preinjury activity level; adverse events were common in both groups.</p> <p><b>Five-year outcomes:</b> No difference in KOOS-4 score (MD -2.00, 95% CI -8.27 to 4.27); treatment failure (RR 0.88, 95% CI 0.62 to 1.25); no difference in Tegner activity score (RR 1.22, 95% CI 0.78 to 1.91); osteoarthritis at five years (RR 1.80, 95% CI 0.92 to 3.52)</p> |
| <b>Arthroscopic meniscal repair</b>                           |                                                                                                                               |                                                                                                 |                                                                  |                                                                                                                                                                                                                                                                                                                                                                                                                                                                                                                               |
| Biedert, 2000                                                 | 40 patients with an isolated and symptomatic painful horizontal grade 2 meniscal lesion on the medial side                    | Arthroscopic repair/arthroscopic minimal resection and repair/arthroscopic partial meniscectomy | Non-surgical treatment                                           | According to IKDC protocols, clinical findings suggested that non-surgical treatment was not satisfactory                                                                                                                                                                                                                                                                                                                                                                                                                     |
| <b>Arthroscopic partial meniscectomy</b>                      |                                                                                                                               |                                                                                                 |                                                                  |                                                                                                                                                                                                                                                                                                                                                                                                                                                                                                                               |
| Katz, 2013                                                    | Symptomatic patients 45 years of age or older with a meniscal tear and evidence of mild-to-moderate osteoarthritis on imaging | Arthroscopic partial meniscectomy and postoperative physical therapy                            | Standardised physical-therapy regimen                            | No significant differences between the study groups in functional improvement WOMAC score (MD 2.4, 95% CI -1.8 to 6.5). The frequency of adverse events was similar between groups                                                                                                                                                                                                                                                                                                                                            |
| Kise, 2016                                                    | 140 middle-aged patients with degenerative meniscal tears.                                                                    | Arthroscopic partial meniscectomy alone                                                         | 12-week supervised exercise therapy alone                        | No clinically relevant difference between the two groups in change in KOOS-4 at two years (MD 0.9, 95% CI -4.3 to 6.1). At three months, muscle strength had improved in the exercise group. No serious adverse events occurred in either group.                                                                                                                                                                                                                                                                              |

| <b>Arthroscopic rotator cuff repair</b>       |                                                                                                                                                                                                                                                                          |                                                      |                                                                       |                                                                                                                                                                                                                                                                                                                                                                                                                                                                                                                                                                                                 |
|-----------------------------------------------|--------------------------------------------------------------------------------------------------------------------------------------------------------------------------------------------------------------------------------------------------------------------------|------------------------------------------------------|-----------------------------------------------------------------------|-------------------------------------------------------------------------------------------------------------------------------------------------------------------------------------------------------------------------------------------------------------------------------------------------------------------------------------------------------------------------------------------------------------------------------------------------------------------------------------------------------------------------------------------------------------------------------------------------|
| Moosmayer, 2010, 2014                         | 103 patients with symptomatic small and medium-sized tears of the rotator cuff                                                                                                                                                                                           | Rotator cuff repair, decompression and exercises     | Physiotherapy                                                         | At one-year, the between-group differences showed better results for the surgery group on the Constant score (MD 13.0 points), on the ASES scale (MD 16.1 points), for pain-free abduction (MD 28.8°) and reduction in pain (MD on a VAS -1.7 cm). At a five-year follow-up, the results of the surgical group were superior in terms of Constant score, ASES scale, VAS for pain and patient satisfaction. The authors noted that though a surgical repair was associated with a better outcome than physiotherapy treatment, the differences were small and may be below clinical importance. |
| Kukkonen, 2014, 2015                          | 180 shoulders (173 patients) with supraspinatus tendon tears                                                                                                                                                                                                             | Rotator cuff repair, acromioplasty and physiotherapy | Physiotherapy (group 1);<br>Acromioplasty and physiotherapy (group 2) | At one-year, the mean change in the Constant score was 17.0, 17.5, and 19.8, respectively (p=0.34); subscores concerning the range of movement and strength were not significantly different between the groups (p=0.74 and p=0.76, respectively). Patient satisfaction was also not different (p=0.14). The authors concluded that at one-year follow-up, operative treatment is no better than conservative treatment. There was no significant difference in clinical outcome between the interventions at the two-year follow-up.                                                           |
| <b>Arthroscopic subacromial decompression</b> |                                                                                                                                                                                                                                                                          |                                                      |                                                                       |                                                                                                                                                                                                                                                                                                                                                                                                                                                                                                                                                                                                 |
| Beard, 2018                                   | 313 patients who had subacromial pain for at least 3 months with intact rotator cuff tendons, were eligible for arthroscopic surgery and had previously completed a non-operative management programme that included exercise therapy and at least one steroid injection | Arthroscopic subacromial decompression               | Placebo surgery (group 1); No intervention (group 2)                  | Mean Oxford Shoulder Score did not differ between the two surgical groups at 6 months (decompression vs arthroscopy (MD -1.3 points, 95% CI -3.9 to 1.3). Both surgical groups showed a small benefit over no treatment, but these differences were not clinically important. There were no differences in complications between the groups.                                                                                                                                                                                                                                                    |
| Paavola, 2018                                 | 210 patients with symptoms consistent with shoulder impingement syndrome                                                                                                                                                                                                 | Arthroscopic subacromial decompression               | Placebo surgery (group 1);<br>Exercise therapy (group 2)              | No clinically relevant between-group differences were seen in shoulder pain at rest and on arm activity outcomes at 24 months. No between-group differences were seen between the ASD and diagnostic arthroscopy groups in the secondary outcomes (Constant score, Simple shoulder test score, 15D score, patient satisfaction) or adverse events. The authors concluded that "In this controlled trial involving patients with a shoulder impingement syndrome, arthroscopic subacromial decompression provided no benefit over                                                                |

|                                    |                                                                                  |                                                                                        |                                                                |                                                                                                                                                                                                                                                                                                                                                                                                                           |
|------------------------------------|----------------------------------------------------------------------------------|----------------------------------------------------------------------------------------|----------------------------------------------------------------|---------------------------------------------------------------------------------------------------------------------------------------------------------------------------------------------------------------------------------------------------------------------------------------------------------------------------------------------------------------------------------------------------------------------------|
|                                    |                                                                                  |                                                                                        |                                                                | diagnostic arthroscopy at 24 months.                                                                                                                                                                                                                                                                                                                                                                                      |
| <b>Carpal tunnel decompression</b> |                                                                                  |                                                                                        |                                                                |                                                                                                                                                                                                                                                                                                                                                                                                                           |
| Gerritsen, 2002                    | 176 patients with clinically and electrophysiologically confirmed idiopathic CTS | Open carpal tunnel release surgery                                                     | Wrist splinting                                                | Surgery was more effective than splinting on all outcome measures (success rates, number of nights waking up due to symptoms, the severity of the main complaint, paraesthesia during the day and at night. Success rates (based on general improvement) (Difference of 26%, 95% CI 12% to 40%)                                                                                                                           |
| Hui, 2005                          | 50 patients with electrophysiologically confirmed idiopathic CTS                 | Open carpal tunnel release surgery                                                     | A single injection of steroid                                  | 20 weeks after randomization, patients who underwent surgery had greater symptomatic improvement than those who were injected. There was greater improvement in the Global Symptom Score, median nerve distal motor latencies and sensory nerve conduction velocity. However, the mean grip strength in the surgical group was reduced by 1.7 kg (SD 5.1) compared with a gain of 2.4 kg (SD 5.5) in the injection group. |
| Jarvik, 2009                       | 116 patients with CTS without denervation                                        | Carpal tunnel surgery                                                                  | Non-surgical treatment (including hand therapy and ultrasound) | There was a significant 12-month adjusted advantage for surgery in function (CTSAQ function score: Delta - 0.40, 95% CI 0.11 to 0.70, p=0.008) and symptoms (CTSAQ symptom score: 0.34, 0.02 to 0.65, p=0.04). There were no clinically important adverse events and no surgical complications.                                                                                                                           |
| <b>Lumbar spine decompression</b>  |                                                                                  |                                                                                        |                                                                |                                                                                                                                                                                                                                                                                                                                                                                                                           |
| Malmivaara, 2007                   | 94 patients with lumbar spinal stenosis                                          | Segmental decompression and an undercutting facetectomy of the affected area performed | Conservative treatment (NSAIDs and physiotherapy)              | Both treatment groups showed improvement during follow-up. At one-year, the mean difference in favour of surgery was 11.3 in disability (95% CI 4.3 to 18.4), 1.7 in leg pain (95% CI 0.4 to 3.0), and 2.3 (95% CI 1.1 to 3.6) in back pain. Walking ability, either reported or measured, did not differ between the two treatment groups.                                                                               |



| <b>Lumbar spine fusion</b>    |                                                                                                                           |                                                    |                                                                                                                |                                                                                                                                                                                                                                                                                                                                                                                                                                                                 |
|-------------------------------|---------------------------------------------------------------------------------------------------------------------------|----------------------------------------------------|----------------------------------------------------------------------------------------------------------------|-----------------------------------------------------------------------------------------------------------------------------------------------------------------------------------------------------------------------------------------------------------------------------------------------------------------------------------------------------------------------------------------------------------------------------------------------------------------|
| Brox, 2006                    | 60 patients with low back pain lasting longer than 1 year after previous surgery for disc herniation                      | Lumbar fusion with posterior transpedicular screws | Cognitive intervention and exercises                                                                           | Oswestry Disability Index was significantly improved from 47 to 38 after fusion and from 45 to 32 after cognitive intervention and exercises (MD -7.3, 95% CI -17.3 to 2.7, p=0.15). The success rate was 50% in the fusion group and 48% in the cognitive intervention/exercise group. For patients with chronic low back pain after previous surgery for disc herniation, lumbar fusion failed to show any benefit over cognitive intervention and exercises. |
| Brox, 2010                    | 124 patients with disc degeneration and at least 1 year of symptoms after or without previous surgery for disc herniation | Lumbar fusion with posterior transpedicular screws | Cognitive intervention and exercises                                                                           | At four years, the mean treatment effect for Oswestry Disability Index was 1.1; 95% CI 5.9 to 8.2. There was no difference in return to work.                                                                                                                                                                                                                                                                                                                   |
| <b>Total knee replacement</b> |                                                                                                                           |                                                    |                                                                                                                |                                                                                                                                                                                                                                                                                                                                                                                                                                                                 |
| Skou, 2015                    | 100 patients with moderate-to-severe knee osteoarthritis were eligible for unilateral TKR.                                | TKR followed by non-surgical treatment             | Non-surgical treatment (consisted of exercise, education, dietary advice, use of insoles, and pain medication) | The total knee replacement group had greater improvement in the KOOS4 score than did the nonsurgical- treatment group (32.5 vs. 16.0; adjusted mean difference, 15.8 [95% CI 10.0 to 21.5]). The total-knee-replacement group had a higher number of serious adverse events than did the nonsurgical-treatment group (24 vs. 6 months, p=0.005).                                                                                                                |

ACL, anterior cruciate ligament; ASES, American Shoulder and Elbow Surgeons; CI, confidence interval; CTS, carpal tunnel syndrome; CTSAQ, Carpal Tunnel Syndrome Assessment Questionnaire; IKDC, International Knee Documentation Committee; KOOS, Knee Injury and Osteoarthritis Outcome Score; MD, mean difference; NSAIDs, Non-steroidal anti-inflammatory drugs; RR, relative risk; SD, standard deviation; TKR, total knee replacement; WOMAC, Western Ontario and McMaster Universities Arthritis Index

## Appendix 9. Reference list of randomised controlled trials at low risk of bias

1. Beard DJ, Rees JL, Cook JA, Rombach I, Cooper C, Merritt N, Shirkey BA, Donovan JL, Gwilym S, Savulescu J *et al*: Arthroscopic subacromial decompression for subacromial shoulder pain (CSAW): a multicentre, pragmatic, parallel group, placebo-controlled, three-group, randomised surgical trial. *Lancet* 2018, 391(10118):329-338.
2. Biedert RM: Treatment of intrasubstance meniscal lesions: a randomized prospective study of four different methods. *Knee Surg Sports Traumatol Arthrosc* 2000, 8(2):104-108.
3. Brox JI, Nygaard OP, Holm I, Keller A, Ingebrigtsen T, Reikeras O: Four-year follow-up of surgical versus non-surgical therapy for chronic low back pain. *Ann Rheum Dis* 2010, 69(9):1643-1648.
4. Brox JI, Reikeras O, Nygaard O, Sorensen R, Indahl A, Holm I, Keller A, Ingebrigtsen T, Grundnes O, Lange JE *et al*: Lumbar instrumented fusion compared with cognitive intervention and exercises in patients with chronic back pain after previous surgery for disc herniation: a prospective randomized controlled study. *Pain* 2006, 122(1-2):145-155.
5. Frobell RB, Roos HP, Roos EM, Roemer FW, Ranstam J, Lohmander LS: Treatment for acute anterior cruciate ligament tear: five year outcome of randomised trial. *BMJ* 2013, 346:f232.
6. Frobell RB, Roos EM, Roos HP, Ranstam J, Lohmander LS. A randomized trial of treatment for acute anterior cruciate ligament tears. *N Engl J Med*. 2010 Jul 22;363(4):331-42
7. Gerritsen AA, de Vet HC, Scholten RJ, Bertelsmann FW, de Krom MC, Bouter LM: Splinting vs surgery in the treatment of carpal tunnel syndrome: a randomized controlled trial. *JAMA* 2002, 288(10):1245-1251.
8. Hui AC, Wong S, Leung CH, Tong P, Mok V, Poon D, Li-Tsang CW, Wong LK, Boet R: A randomized controlled trial of surgery vs steroid injection for carpal tunnel syndrome. *Neurology* 2005, 64(12):2074-2078.
9. Jarvik JG, Comstock BA, Kliot M, Turner JA, Chan L, Heagerty PJ, Hollingworth W, Kerrigan CL, Deyo RA: Surgery versus non-surgical therapy for carpal tunnel syndrome: a randomised parallel-group trial. *Lancet* 2009, 374(9695):1074-1081.
10. Katz JN, Brophy RH, Chaisson CE, de Chaves L, Cole BJ, Dahm DL, Donnell-Fink LA, Guermazi A, Haas AK, Jones MH *et al*: Surgery versus physical therapy for a meniscal tear and osteoarthritis. *N Engl J Med* 2013, 368(18):1675-1684.
11. Kise NJ, Risberg MA, Stensrud S, Ranstam J, Engebretsen L, Roos EM: Exercise therapy versus arthroscopic partial meniscectomy for degenerative meniscal tear in middle aged patients: randomised controlled trial with two year follow-up. *BMJ* 2016, 354:i3740.
12. Kukkonen J, Joukainen A, Lehtinen J, Mattila KT, Tuominen EK, Kauko T, Aarimaa V: Treatment of non-traumatic rotator cuff tears: A randomised controlled trial with one-year clinical results. *Bone Joint J* 2014, 96-B(1):75-81.
13. Kukkonen J, Joukainen A, Lehtinen J, Mattila KT, Tuominen EK, Kauko T, Aarimaa V: Treatment of Nontraumatic Rotator Cuff Tears: A Randomized Controlled Trial with Two Years of Clinical and Imaging Follow-up. *J Bone Joint Surg Am* 2015, 97(21):1729-1737.
14. Malmivaara A, Slati P, Heliövaara M, Sainio P, Kinnunen H, Kankare J, Dalin-Hirvonen N, Seitsalo S, Herno A, Kortekangas P *et al*: Surgical or nonoperative treatment for lumbar spinal stenosis? A randomized controlled trial. *Spine (Phila Pa 1976)* 2007, 32(1):1-8.
15. Moosmayer S, Lund G, Seljom U, Svege I, Hennig T, Tariq R, Smith HJ: Comparison between surgery and physiotherapy in the treatment of small and medium-sized tears of the rotator cuff: A randomised controlled study of 103 patients with one-year follow-up. *J Bone Joint Surg Br* 2010, 92(1):83-91.
16. Moosmayer S, Lund G, Seljom US, Haldorsen B, Svege IC, Hennig T, Pripp AH, Smith HJ: Tendon repair compared with physiotherapy in the treatment of rotator cuff tears: a randomized controlled study in 103 cases with a five-year follow-up. *J Bone Joint Surg Am* 2014, 96(18):1504-1514.
17. Paavola M, Kanto K, Ranstam J, Malmivaara A, Inkinen J, Kalske J, Savolainen V, Sinisaari I, Taimela S, Jarvinen TL *et al*: Subacromial decompression versus diagnostic arthroscopy for shoulder impingement: a 5-year follow-up of a randomised, placebo surgery controlled clinical trial. *Br J Sports Med* 2021, 55(2):99-107.
18. Skou ST, Roos EM, Laursen MB, Rathleff MS, Arendt-Nielsen L, Simonsen O, Rasmussen S: A Randomized, Controlled Trial of Total Knee Replacement. *N Engl J Med* 2015, 373(17):1597-1606.

## Appendix 10. Major guideline recommendations on subacromial decompression surgery

| Guideline body/organisation                                                                                                                                                                                                         | Recommendation                                                                                                                                                      |
|-------------------------------------------------------------------------------------------------------------------------------------------------------------------------------------------------------------------------------------|---------------------------------------------------------------------------------------------------------------------------------------------------------------------|
| European Society for Surgery of the Shoulder and the Elbow                                                                                                                                                                          | No recommendation for or against subacromial decompression surgery                                                                                                  |
| British Elbow and Shoulder Society/British Orthopaedic Association 2014                                                                                                                                                             | Recommended in the absence of a rotator cuff tear if impingement symptoms fail to resolve with nonoperative treatment                                               |
| NHS England in partnership with NHS Clinical Commissioners, the Academy of Medical Royal Colleges, NHS Improvement and the National Institute for Health and Care Excellence (Evidence-Based Interventions: Guidance for CCGs 2018) | Recommended for patients with pure subacromial shoulder impingement who have persistent or progressive symptoms, despite adequate nonoperative treatment            |
| Dutch Orthopaedic Association 2020                                                                                                                                                                                                  | Not recommended                                                                                                                                                     |
| American Academy of Orthopaedic Surgeons guidelines                                                                                                                                                                                 | No recommendation for or against subacromial decompression surgery                                                                                                  |
| Australian Orthopaedic Association (Shoulder and Elbow Society of Australia) December 2017 Statement                                                                                                                                | Should only be performed for symptoms that are significant and persistent and that have not responded to non-operative care, including injections and physiotherapy |
| Canadian Medical Association and Canadian Orthopaedic Association-Arthroscopy Association of Canada                                                                                                                                 | No recommendation for or against subacromial decompression surgery                                                                                                  |

## Appendix 11. Common orthopaedic procedures, body of evidence and recommendations by clinical guidelines

| Procedure                                              | Body of evidence                                                                                                             | Guideline recommendations                                                                                                                                                                                                                                                                                                                                                                                                                                                                                                                                                                                                                                                                                                                                                                                                                                                                                                                                                                                                                                                                                                                              |
|--------------------------------------------------------|------------------------------------------------------------------------------------------------------------------------------|--------------------------------------------------------------------------------------------------------------------------------------------------------------------------------------------------------------------------------------------------------------------------------------------------------------------------------------------------------------------------------------------------------------------------------------------------------------------------------------------------------------------------------------------------------------------------------------------------------------------------------------------------------------------------------------------------------------------------------------------------------------------------------------------------------------------------------------------------------------------------------------------------------------------------------------------------------------------------------------------------------------------------------------------------------------------------------------------------------------------------------------------------------|
| Arthroscopic anterior cruciate ligament reconstruction | Observational and limited RCT evidence suggests ACL reconstruction is not superior to non-surgical treatment                 | Clinical Practice Guidelines developed by the American Academy of Orthopaedic Surgeons (AAOS) recommend ACL reconstruction in active young adult (18-35) patients with an ACL tear. The strength of the recommendation was moderate. The guidelines indicate limited evidence to support non-surgical management for less active patients with less clinically assessed laxity. Furthermore, when ACL reconstruction is indicated, moderate evidence supports reconstruction within five months of injury to prevent secondary damage to the articular cartilage and menisci.                                                                                                                                                                                                                                                                                                                                                                                                                                                                                                                                                                          |
| Arthroscopic meniscal repair of the knee               | Evidence based on mostly observational studies suggests that meniscal repair has better outcomes than meniscectomy.          | The 2018 British Association for Surgery of the Knee (BASK) Arthroscopic Meniscal Surgery Treatment Guidance was developed to provide an evidence-based national treatment guideline for patients with meniscal lesions of the knee. The Guideline group agreed to four possible treatment recommendations for meniscal lesions: (i) urgent arthroscopic meniscal surgery; (ii) consider arthroscopic meniscal repair; (iii) consider non-urgent arthroscopic partial meniscectomy; and (iv) optimized non-surgical treatment and re-assessment. Arthroscopic meniscal repair was recommended to preserve the meniscus when a reparable target lesion was identified following an acute injury. This decision was to be made by a clinician on a case-by-case basis in careful consultation with the patient. Though the guideline development process was informed by published and unpublished clinical and epidemiological evidence, the recommendations for arthroscopic meniscal repair were based on mostly indirect evidence and low-quality observational studies. The guideline group highlighted this as a priority area for further search. |
| Arthroscopic partial meniscectomy of the knee          | Evidence based on RCT evidence suggests APM does not show clinically important benefit over non-operative treatment.         | Consensus statements from specialist knee societies do not recommend APM in patients with knee pain and a meniscal tear, especially in patients with significant or end-stage osteoarthritis. It is only recommended in patients with an 'unstable' pattern of meniscal tear visible on magnetic resonance imaging that corresponds with meniscal ('mechanical') type symptoms and that it should only be performed in patients who have failed a period of non-surgical treatment.                                                                                                                                                                                                                                                                                                                                                                                                                                                                                                                                                                                                                                                                    |
| Arthroscopic rotator cuff repair                       | Evidence based on RCT evidence showed no clinically important benefits of arthroscopic RCR over non-operative care.          | Evidence from AAOS guideline recommendations suggests that physical therapy or operative treatment can be used for the treatment of patients with rotator cuff tears as they both result in significant improvement in patient-reported outcome measures (PROMs). Evidence demonstrates no preferential support for open or arthroscopic repairs, but the arthroscopic-only technique is associated with better short-term improvement in postoperative recovery of motion and decreased VAS scores based on individual RCTs.                                                                                                                                                                                                                                                                                                                                                                                                                                                                                                                                                                                                                          |
| Arthroscopic subacromial decompression                 | Evidence based on RCT evidence showed no clinically important benefits of subacromial decompression over non-operative care. | Guidelines have provided inconsistent recommendations on subacromial decompression surgery for subacromial impingement syndrome, with the majority not making a recommendation for or against the procedure. The British Elbow and Shoulder Society (BESS)/British Orthopaedic Association (BOA) guidelines recommend subacromial decompression surgery in the absence of a rotator cuff tear if impingement symptoms fail to resolve with nonoperative treatment. In a recent Rapid Recommendation published in the British Medical Journal, the guideline panel made a strong recommendation against subacromial decompression surgery in light of recent evidence, including an RCT, which showed no clinically important differences between ASAD and investigational arthroscopy or no treatment for pain and function. In updated guidance published by National Health Service (NHS) England, ASAD is recommended for patients with pure subacromial shoulder impingement who have persistent or progressive symptoms, despite adequate non-operative treatment.                                                                                |

|                             |                                                                                                                                                                                                                                                                                                                                               |                                                                                                                                                                                                                                                                                                                                                                                                                                                                                                                                                                                                                                                                                                                                                                                                                                                                                                                                                                                                                |
|-----------------------------|-----------------------------------------------------------------------------------------------------------------------------------------------------------------------------------------------------------------------------------------------------------------------------------------------------------------------------------------------|----------------------------------------------------------------------------------------------------------------------------------------------------------------------------------------------------------------------------------------------------------------------------------------------------------------------------------------------------------------------------------------------------------------------------------------------------------------------------------------------------------------------------------------------------------------------------------------------------------------------------------------------------------------------------------------------------------------------------------------------------------------------------------------------------------------------------------------------------------------------------------------------------------------------------------------------------------------------------------------------------------------|
| Carpal tunnel decompression | Evidence based on RCT evidence showed surgical treatment relieved symptoms significantly better than non-surgical treatment.                                                                                                                                                                                                                  | The Commissioning Guide for the treatment of CTS developed by the Surgical Speciality Associations and Royal College of Surgeons recommend open or endoscopic decompression of CTS in secondary care for persistent severe symptoms that do not improve with splinting at night, analgesics, and corticosteroid injection for up to 12 weeks. Although no preference was given to either procedure because of the equivocal evidence, it was suggested endoscopic procedures might result in greater patient satisfaction whilst being more costly. It was recommended that open surgery be reserved for elderly patients with multiple comorbidities. Clinical Practice Guidelines developed by the AAOS strongly recommend surgical treatment of CTS compared to nonoperative treatments such as splinting, nonsteroidal anti-inflammatory drugs (NSAIDs), and a single steroid injection. There was limited evidence to support endoscopic release over open release based on possible short-term benefits. |
| Lumbar spine decompression  | Evidence based on RCT evidence showed similar effects for decompression and non-surgical treatment.                                                                                                                                                                                                                                           | The NICE Clinical Guideline recommends that spinal decompression should be considered for people with sciatica when non-surgical treatment has not improved pain or function and their radiological findings are consistent with sciatic symptoms.                                                                                                                                                                                                                                                                                                                                                                                                                                                                                                                                                                                                                                                                                                                                                             |
| Lumbar spine fusion         | Evidence based on RCT evidence showed similar effects for LSF and non-surgical treatment.                                                                                                                                                                                                                                                     | The NICE Clinical Guideline does not recommend LSF for people with low back pain other than in the context of an RCT due to the lack of evidence of clinical effectiveness.                                                                                                                                                                                                                                                                                                                                                                                                                                                                                                                                                                                                                                                                                                                                                                                                                                    |
| Total hip replacement       | There are no individual RCTs that have compared THR with non-operative care, no treatment, placebo, or sham surgery for the treatment of end-stage OA.                                                                                                                                                                                        | For patients with end-stage osteoarthritis of the hip, both THR and resurfacing arthroplasty are recommended as treatment options only if the prostheses have rates/projected rates of revision of 5% or less at ten years. Guidelines from other bodies such as OARSI and European League Against Rheumatism (EULAR) recommend a hip replacement for patients with radiographic evidence of hip OA who have refractory pain and disability. The evidence for these recommendations is based on head-to-head comparisons between different types of hip prosthesis and uncontrolled studies that have used prosthesis survival as the primary outcome measure.                                                                                                                                                                                                                                                                                                                                                 |
| Total knee replacement      | There are RCTs comparing TKR with no treatment, placebo, or sham surgery for the treatment of end-stage OA. One RCT compared TKR followed by non-surgical treatment versus non-surgical treatment alone (exercise, education, dietary advice, use of insoles, and analgesics) in patients with moderate-to-severe knee OA (published in 2015) | The first-line treatment for patients with hip OA is the same as for knee OA, as recommended by NICE Clinical Guideline for Osteoarthritis: care and management. For patients who experience joint symptoms (pain, stiffness, and reduced function) that have a substantial impact on their QoL and are refractory to non-surgical treatment, they recommend joint replacement surgery. Total knee replacement is the preferred surgical option in those with symptomatic OA affecting the entire tibiofemoral joint. Guidelines from other bodies such as OARSI and EULAR also recommend TKR for patients with radiographic evidence of knee OA who have refractory pain and disability. The evidence base for these recommendations is built wholly on observational retrospective studies that have often used prosthesis survival as the primary outcome measure.                                                                                                                                          |

ACL, anterior cruciate ligament; APM, arthroscopic partial meniscectomy ASAD, arthroscopic subacromial decompression; CTS, carpal tunnel syndrome; LSF, lumbar spine fusion; OA, osteoarthritis; RCT, randomised controlled trial; THR, total hip replacement; TKR, total knee replacement
